# Supplementary material for: N-Heterocycle-fused Ni(ii) porphyrin dimers upon heating of meso-amino Ni(ii) porphyrins in nitrobenzene
Source: Royal Society of Chemistry journal article supplement (doi:10.1039/d3qo01265d), 2023-01-01
Supplement: d3qo01265d1.pdf [file d3qo01265d1.pdf]

# Supporting Information

*N*-Heterocycle-fused Ni(II) porphyrin dimers upon heating of  
*meso*-amino Ni(II) porphyrins in nitrobenzene

Qingjie Pan, Li Liu, Ying Pan, Mingbo Zhou,\* Ling Xu, Yutao Rao, Bangshao Yin,  
Jianxin Song,\* and Atsuhiko Osuka

Key Laboratory of Chemical Biology and Traditional Chinese Medicine Research (Ministry of Education of China), and Key Laboratory of the Assembly and Application of Organic Functional Molecules of Hunan Province, College of Chemistry and Chemical Engineering, Hunan Normal University, Changsha 410081, P. R. China

E-mail: zhoumingbo@hunnu.edu.cn to M. Z. and jxsong@hunnu.edu.cn to J. S.

## Table of Contents

|                                                     |    |
|-----------------------------------------------------|----|
| 1. Materials and instrumentation.....               | 3  |
| 2. Data of fused porphyrin dimers <b>9-13</b> ..... | 3  |
| 3. NMR spectra .....                                | 7  |
| 4. MALDI-TOF mass spectra .....                     | 16 |
| 5. UV/Vis/NIR absorption spectra and data.....      | 19 |
| 6. Electrochemical properties. ....                 | 21 |
| 7. DFT calculations .....                           | 23 |
| 8. X-ray crystal structures and data.....           | 26 |
| 9. References .....                                 | 44 |

## 1. Materials and instrumentation

$^1\text{H}$  NMR (500 MHz) and  $^{13}\text{C}$  NMR (126 MHz) spectra were taken on a Bruker AVANCE-500 spectrometer. Chemical shifts were reported as the delta scale in ppm. The residual peak of  $\text{CDCl}_3$  was used as internal reference for  $^1\text{H}$  NMR ( $\delta = 7.26$  ppm) and  $^{13}\text{C}$  NMR ( $\delta = 77.0$  ppm); toluene- $d_8$  was used as internal reference for  $^1\text{H}$  NMR ( $\delta = 7.01$  ppm). UV/Vis/NIR absorption spectra were recorded on a Shimadzu UV-3600 spectrometer. MALDI-TOF mass spectra were obtained with a Bruker ultrafle Xtreme MALDI-TOF/TOF spectrometer with matrix. All solvents and reagents were commercially available and used without further purification. Column chromatography was carried out on silica gel (100-200 mesh). Amino Ni(II) porphyrins **5** and **6** were synthesized according to the reported procedures.<sup>[S1]</sup>

## 2. Data of fused porphyrin dimers 9-13

Data of **9**:  $^1\text{H}$  NMR (500 MHz,  $\text{CDCl}_3$ , 298 K)  $\delta = 10.85$  (s, 1H, *N*-H), 10.75 (s, 1H, *meso*-H), 9.92 (s, 1H,  $\beta$ -H), 9.25 (d,  $J = 5.0$  Hz, 1H,  $\beta$ -H), 9.06 (d,  $J = 5.0$  Hz, 1H,  $\beta$ -H), 8.96 (d,  $J = 5.0$  Hz, 1H,  $\beta$ -H), 8.92 (d,  $J = 5.0$  Hz, 1H,  $\beta$ -H), 8.86 (br, 2H, Ar-H), 8.77 (d,  $J = 5.0$  Hz, 1H,  $\beta$ -H), 8.67 (d,  $J = 5.0$  Hz, 1H,  $\beta$ -H), 8.63 (d,  $J = 5.0$  Hz, 1H,  $\beta$ -H), 8.60 (d,  $J = 5.0$  Hz, 1H,  $\beta$ -H), 8.52 (d,  $J = 5.0$  Hz, 1H,  $\beta$ -H), 8.39 (t,  $J = 2.0$  Hz, 1H, Ar-H), 8.31 (d,  $J = 2.0$  Hz, 2H, Ar-H), 8.27 (d,  $J = 2.0$  Hz, 2H, Ar-H), 8.19 (d,  $J = 5.0$  Hz, 1H,  $\beta$ -H), 7.97 (d,  $J = 2.0$  Hz, 2H, Ar-H), 7.96 (d,  $J = 2.0$  Hz, 2H, Ar-H), 7.94 (d,  $J = 2.0$  Hz, 2H, Ar-H), 7.92 (t,  $J = 2.0$  Hz, 1H Ar-H), 7.86 (d,  $J = 2.0$  Hz, 2H, Ar-H), 7.79 (d,  $J = 5.0$  Hz, 1H,  $\beta$ -H), 7.78 (d,  $J = 5.0$  Hz, 1 H,  $\beta$ -H) 7.76 (t,  $J = 2.0$  Hz, 1H, Ar-H), 7.68 (t,  $J = 2.0$  Hz, 1H, Ar-H), 1.71 (br, 18H, *t*-Bu-H), 1.57 (br,

36H, *t*-Bu-H), 1.54 (br, 18H, *t*-Bu-H), 1.50 (br, 18H, *t*-Bu-H), and 1.49 (br, 18H, *t*-Bu-H) ppm. <sup>13</sup>C NMR (126 MHz, CDCl<sub>3</sub>, 298 K) δ = 152.5, 149.7, 149.1, 148.99, 148.97, 148.9, 146.5, 144.8, 143.8, 143.5, 143.1, 142.3, 141.8, 141.3, 141.0, 140.5, 140.4, 140.0, 139.9, 139.79, 139.77, 138.9, 136.8, 134.0, 133.5, 132.9, 132.8, 132.6, 132.4, 132.1, 132.0, 131.9, 131.8, 130.9, 130.4, 130.1, 129.3, 129.13, 129.06, 128.72, 128.65, 128.5, 127.7, 124.2, 122.8, 122.3, 121.28, 121.26, 121.0, 120.8, 120.6, 120.5, 120.1, 119.2, 117.4, 116.2, 114.7, 110.6, 101.3, 35.6, 35.3, 35.08, 35.06, 35.03, and 34.99 ppm. MALDI-TOF-MS: *m/z* = 1872.0097, calcd for C<sub>124</sub>H<sub>141</sub>N<sub>9</sub>Ni<sub>2</sub><sup>+</sup> [M]<sup>+</sup>: 1872.0011. UV-vis (CH<sub>2</sub>Cl<sub>2</sub>) λ<sub>max</sub> ([M<sup>-1</sup>cm<sup>-1</sup>]) = 415 nm (120000), 457 nm (193000), 529 nm (38000), and 637 nm (45000).

Data of **10**: <sup>1</sup>H NMR (500 MHz, CDCl<sub>3</sub>, 298 K) δ = 11.55 (s, 1H, *meso*-H), 9.15 (d, *J* = 5.0 Hz, 1H, β-H), 8.93 (d, *J* = 5.0 Hz, 1H, β-H), 8.88 (d, *J* = 5.0 Hz, 1H, β-H), 8.83 (d, *J* = 5.00 Hz, 1H, β-H), 8.75 (d, *J* = 5.0 Hz, 1H, β-H), 8.71 (d, *J* = 5.0 Hz, 1H, β-H), 8.26 (d, *J* = 5.0 Hz, 1H, β-H), 8.06 (d, *J* = 5.0 Hz, 1H, β-H), 8.00 (d, *J* = 5.0 Hz, 1H, β-H), 7.96 (d, *J* = 2.0 Hz, 2H, Ar-H), 7.95 (d, *J* = 2.0 Hz, 1H, Ar-H), 7.90 (d, *J* = 2.0 Hz, 2H, Ar-H), 7.89 (br, 1H, β-H), 7.88 (d, *J* = 2.0 Hz, 2H, Ar-H), 7.80 (d, *J* = 5.0 Hz, 1H, β-H), 7.75 (t, *J* = 2.0 Hz, 4H, Ar-H), 7.73 (t, *J* = 2.0 Hz, 2H, Ar-H), 7.69 (d, *J* = 5.0 Hz, 1H, β-H), 7.66 (d, *J* = 2.0 Hz, 2H, Ar-H), 7.64 (d, *J* = 2.0 Hz, 1H, Ar-H), 7.62 (d, *J* = 2.0 Hz, 2H, Ar-H), 1.57 (br, 18H, *t*-Bu-H) 1.52 (br, 36H, *t*-Bu-H) 1.48 (br, 18H, *t*-Bu-H), and 1.45 (br, 36H, *t*-Bu-H) ppm. <sup>13</sup>C NMR (126 MHz, CDCl<sub>3</sub>, 298 K) δ = 192.1, 154.4, 152.9, 150.7, 149.9, 149.63, 149.57, 149.12, 149.11, 149.0, 145.2, 144.6, 143.8, 142.9, 142.2, 142.1, 141.5, 141.3, 140.9, 140.73, 140.69, 140.1,

139.6, 139.5, 138.4, 138.3, 138.2, 137.0, 136.8, 135.2, 133.8, 133.4, 133.1, 132.9, 132.7, 132.1, 131.7, 131.6, 131.5, 130.7, 130.0, 129.3, 129.2, 128.9, 128.4, 128.33, 128.26, 128.2, 127.6, 126.9, 126.8, 126.1, 123.0, 121.9, 121.8, 121.7, 121.5, 121.3, 121.2, 120.1, 119.4, 116.0, 104.2, 35.2, 35.1, 35.04, 35.01, 34.98, and 34.96 ppm. MALDI-TOF-MS:  $m/z = 1885.9819$ , calcd for  $C_{124}H_{139}N_9Ni_2O^+$   $[M]^+$ : 1885.9804. UV-vis ( $CH_2Cl_2$ )  $\lambda_{max}$  ( $[M^{-1}cm^{-1}]$ ) = 420 nm (148000), 537 nm (72000), 711 nm (29000), and 796 nm (22000).

Data of **11**:  $^1H$  NMR (500 MHz,  $CDCl_3$ , 298 K)  $\delta = 9.09$  (d,  $J = 5.0$  Hz, 2H,  $\beta$ -H), 8.59 (d,  $J = 5.0$  Hz, 2H,  $\beta$ -H), 8.58 (d,  $J = 5.0$  Hz, 2H,  $\beta$ -H), 8.50 (d,  $J = 5.0$  Hz, 2H,  $\beta$ -H), 8.37 (br, 4H,  $\beta$ -H), 8.11 (d,  $J = 1.5$  Hz, 4H, Ar-H), 8.07 (d,  $J = 1.5$  Hz, 2H, Ar-H), 7.86 (d,  $J = 2.0$  Hz, 4H, Ar-H), 7.84 (d,  $J = 1.5$  Hz, 4H, Ar-H), 7.76 (t,  $J = 2.0$  Hz, 2H, Ar-H), 7.72 (t,  $J = 2.0$  Hz, 2H, Ar-H), 1.55 (br, 36H,  $t$ -Bu-H), 1.52 (br, 36H,  $t$ -Bu-H), and 1.49 (br, 36H,  $t$ -Bu-H) ppm.  $^{13}C$  NMR (126 MHz,  $CDCl_3$ , 298 K)  $\delta = 161.3, 150.3, 149.20, 149.15, 149.1, 143.5, 143.2, 141.6, 141.4, 139.7, 139.4, 138.2, 135.4, 134.3, 133.4, 131.4, 131.0, 130.6, 130.4, 128.7, 128.3, 128.0, 127.6, 127.0, 125.6, 121.7, 121.4, 121.39, 118.5, 35.2, 35.1, \text{ and } 35.0$  ppm; HR-MS (MALDI-TOF-MS)  $m/z = 1882.9773$ , calcd for  $C_{124}H_{138}N_{10}Ni_2^+$   $[M]^+$ : 1882.9807. UV-vis ( $CH_2Cl_2$ )  $\lambda_{max}$  ( $[M^{-1}cm^{-1}]$ ) = 404 nm (75000), 516 nm (93000), 555 nm (92000), 745 nm (27000), and 896 nm (58000).

Data of **12**:  $^1H$  NMR (500 MHz, toluene- $d_8$ , 353 K)  $\delta = 9.44$  (d,  $J = 4.5$  Hz, 2H,  $\beta$ -H), 8.78 (d,  $J = 4.5$  Hz, 2H,  $\beta$ -H), 8.56 (d,  $J = 5.0$  Hz, 2H,  $\beta$ -H), 8.49 (d,  $J = 2.0$  Hz, 4H, Ar-H), 8.45 (d,  $J = 4.5$  Hz, 2H,  $\beta$ -H), 8.35 (d,  $J = 4.5$  Hz, 2H,  $\beta$ -H), 8.31-8.30 (m,

4H, containing 2  $\beta$ -H ), 8.10 (d,  $J = 2.0$  Hz, 4H, Ar-H), 8.06 (d,  $J = 2.0$  Hz, 4H, Ar-H), 7.89 (d,  $J = 2.0$  Hz, 2H, Ar-H), 7.87 (d,  $J = 2.0$  Hz, 2H, Ar-H), 3.20 (s, 1H,  $N$ -H), 2.40 (s, 1H,  $N$ -H), 1.66 (br, 36H,  $t$ -Bu-H), 1.48 (br, 36H,  $t$ -Bu-H), and 1.46 (br, 36H,  $t$ -Bu-H) ppm.  $^{13}\text{C}$  NMR (126 MHz,  $\text{CDCl}_3$ , 298 K)  $\delta = 150.3, 149.1, 148.9, 140.9, 139.1, 138.6, 130.4, 128.8, 128.4, 128.3, 121.8, 121.5, 121.3, 35.3, 35.1, \text{ and } 35.0$  ppm. HR-MS (MALDI-TOF-MS)  $m/z = 1771.1479$ , calcd for  $\text{C}_{124}\text{H}_{142}\text{N}_{10}^+$   $[\text{M}]^+$ : 1771.1413. UV-vis ( $\text{CH}_2\text{Cl}_2$ )  $\lambda_{\text{max}}$  ( $[\text{M}^{-1}\text{cm}^{-1}]$ ) = 398 nm (100000), 517 nm (109000), 811 nm (30000), and 899 nm (62000).

Data of **13**:  $^1\text{H}$  NMR (500 MHz,  $\text{CDCl}_3$ , 298 K)  $\delta = 9.24$  (d,  $J = 5.0$  Hz, 2H,  $\beta$ -H), 8.67 (d,  $J = 5.0$  Hz, 2H,  $\beta$ -H), 8.66 (d,  $J = 5.0$  Hz, 2H,  $\beta$ -H), 8.53 (d,  $J = 5.0$  Hz, 2H,  $\beta$ -H), 8.43 (d,  $J = 5.0$  Hz, 2H,  $\beta$ -H ), 8.42 (d,  $J = 5.0$  Hz, 2H,  $\beta$ -H ), 8.34 (br, 4H, Ar - H), 8.17 (t,  $J = 1.5$  Hz, 2H, Ar-H), 8.00 (d,  $J = 1.5$  Hz, 4H, Ar-H), 7.94 (d,  $J = 2.0$  Hz, 4H, Ar-H), 7.80 (t,  $J = 1.5$  Hz, 2H, Ar-H), 7.73 (t,  $J = 2.0$  Hz, 2H, Ar-H), 1.62 (br, 36H,  $t$ -Bu-H), 1.55 (br, 36H,  $t$ -Bu-H), and 1.50 (br, 36H,  $t$ -Bu-H) ppm.  $^{13}\text{C}$  NMR (126 MHz,  $\text{CDCl}_3$ , 298K)  $\delta = 159.2, 158.7, 156.4, 150.2, 150.0, 149.6, 149.3, 148.9, 148.8, 148.1, 142.0, 141.2, 141.0, 140.1, 134.6, 133.6, 131.6, 131.2, 130.8, 130.4, 129.9, 128.7, 128.5, 127.4, 125.6, 121.4, 121.4, 121.1, 120.8, 35.3, 35.1, \text{ and } 35.0$  ppm. MALDI-TOF-MS:  $m/z = 1894.9683$ , calcd for  $\text{C}_{124}\text{H}_{138}\text{N}_{10}\text{Zn}_2^+$   $[\text{M}]^+$ : 1894.9633. UV-vis ( $\text{CH}_2\text{Cl}_2$ )  $\lambda_{\text{max}}$  ( $[\text{M}^{-1}\text{cm}^{-1}]$ ) = 402 nm (116000), 520 nm (148000), 568 nm (74000), 827 nm (36000), and 927 nm (100000).

### 3. NMR spectra

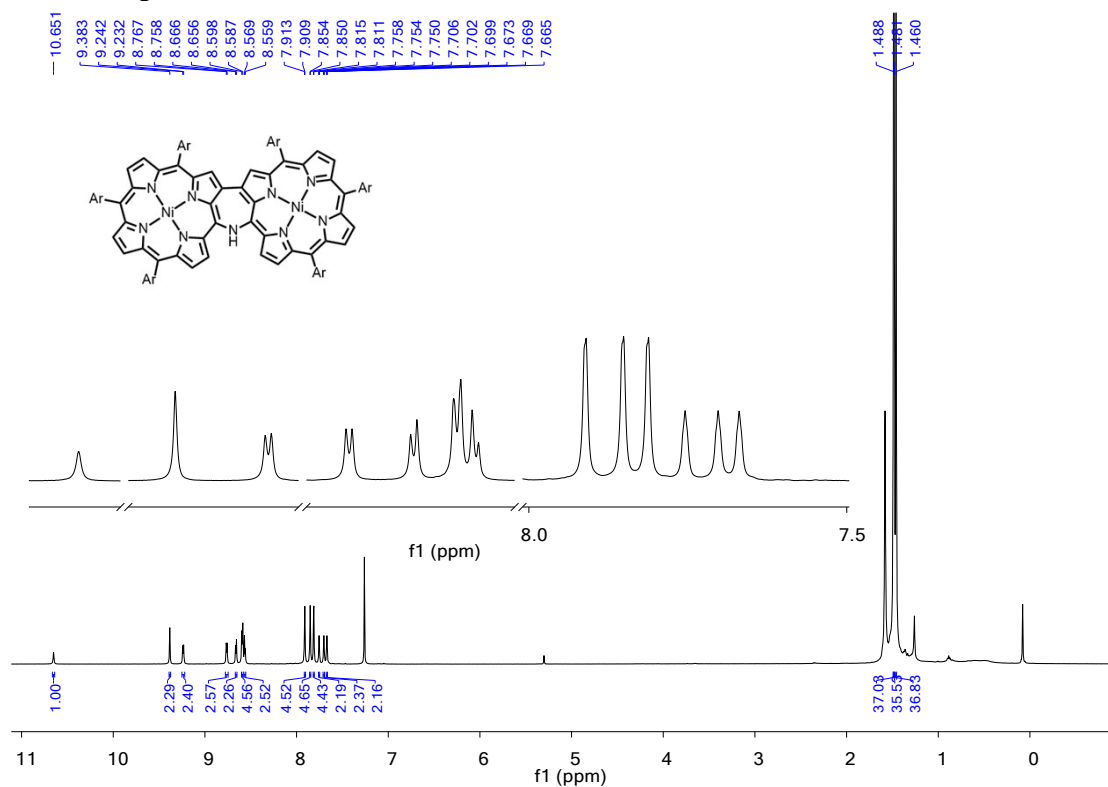

Figure S1. <sup>1</sup>H NMR spectrum of **7** (known compound) in CDCl<sub>3</sub> at 298 K

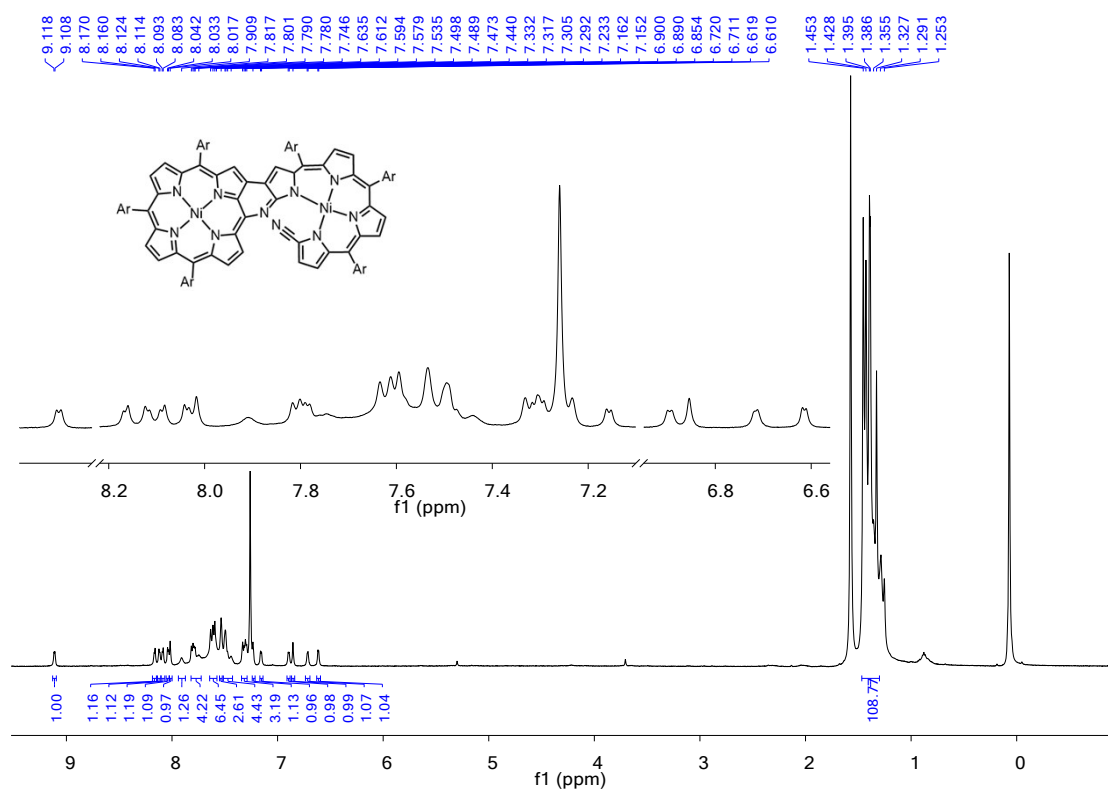

Figure S2. <sup>1</sup>H NMR spectrum of **8** (known compound) in CDCl<sub>3</sub> at 298 K

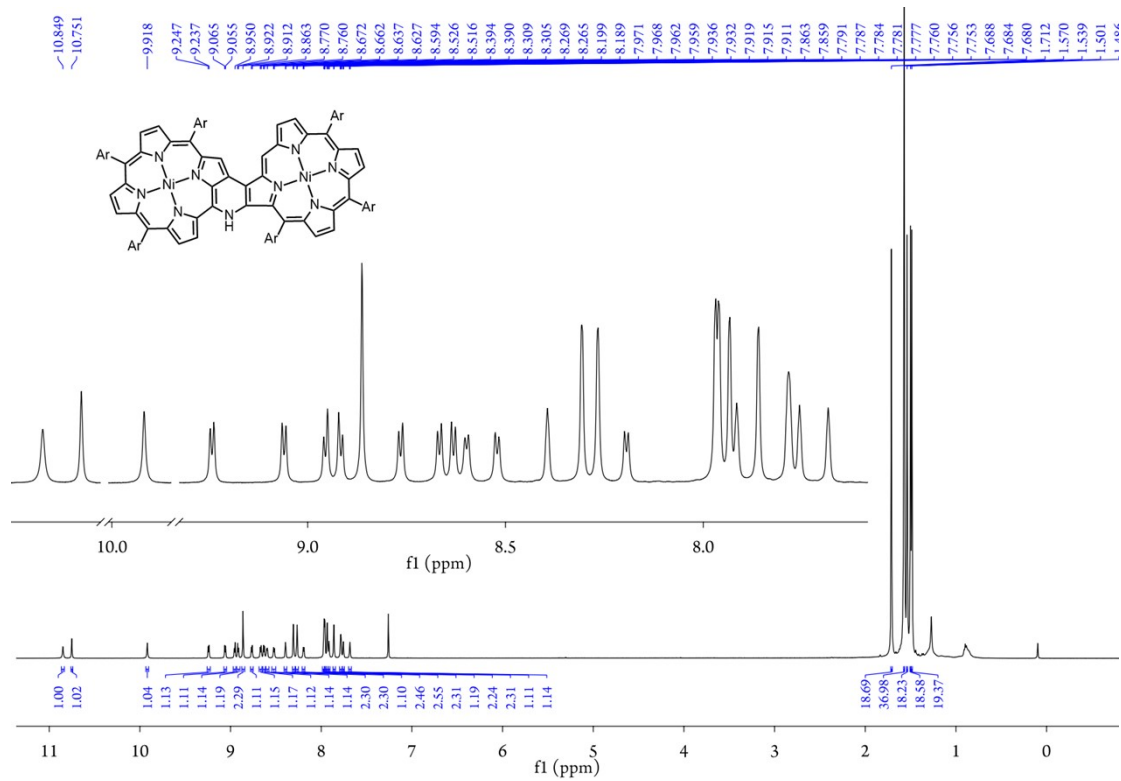

**Figure S3.**  $^1\text{H}$  NMR spectrum of **9** in  $\text{CDCl}_3$  at 298 K

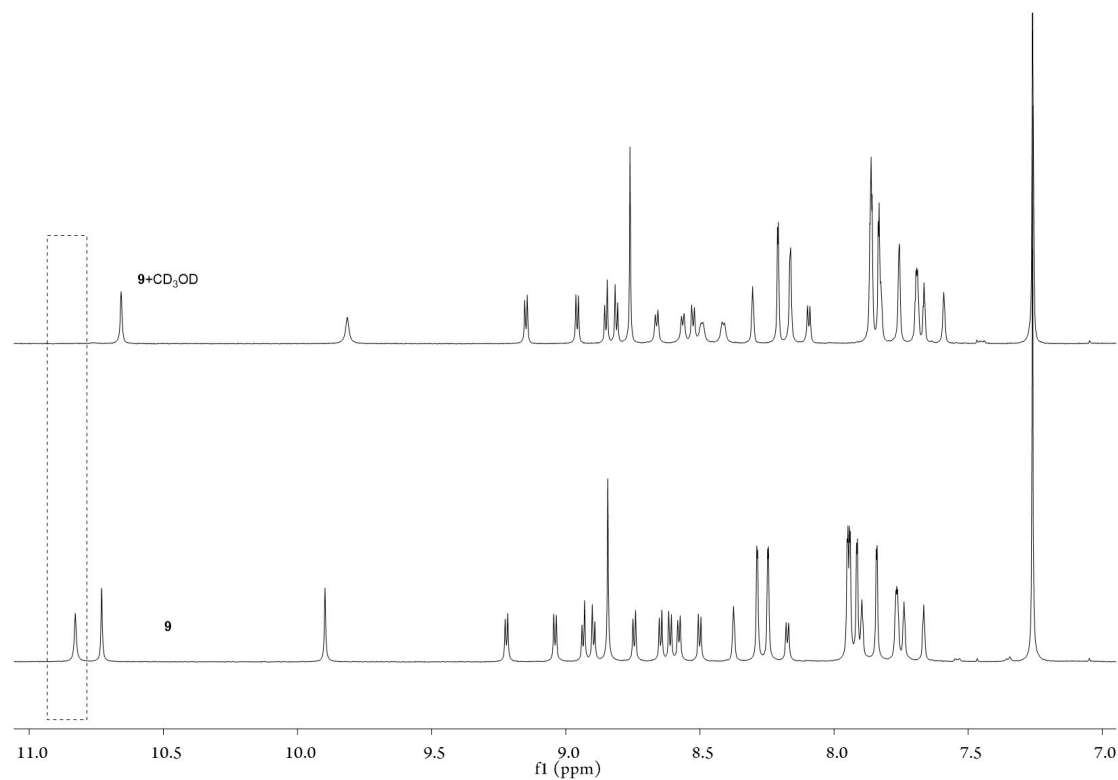

**Figure S4.**  $^1\text{H}$  NMR spectra of **9** and **9** with  $\text{CD}_3\text{OD}$  in  $\text{CDCl}_3$  at 298 K



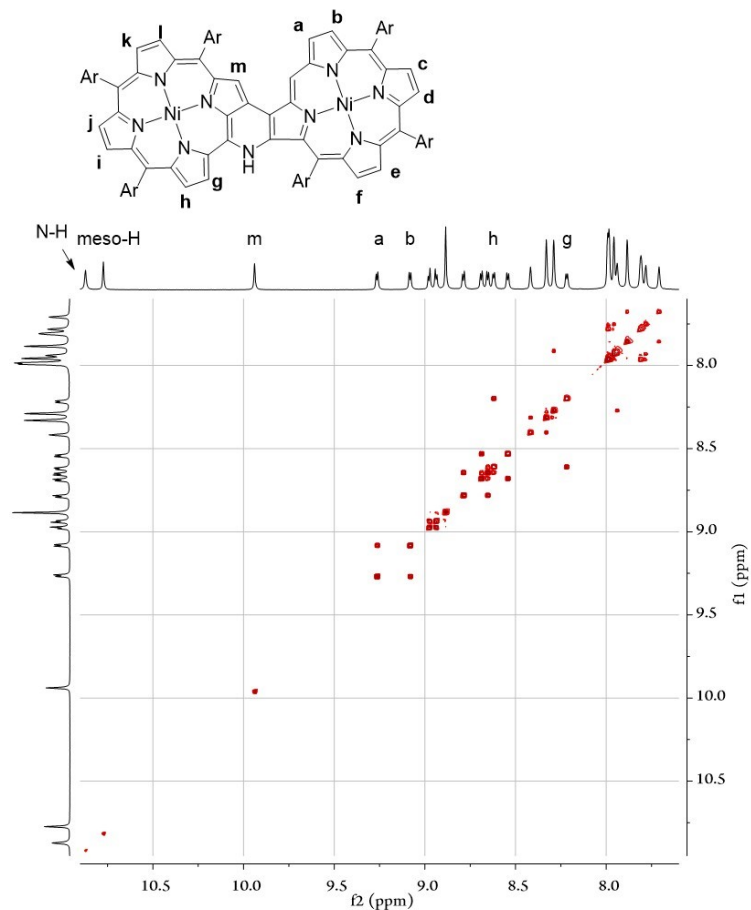

Figure S5.  $^1\text{H}$ - $^1\text{H}$  COSY spectrum of **9** (10.85-7.60 ppm) in  $\text{CDCl}_3$  at 298 K

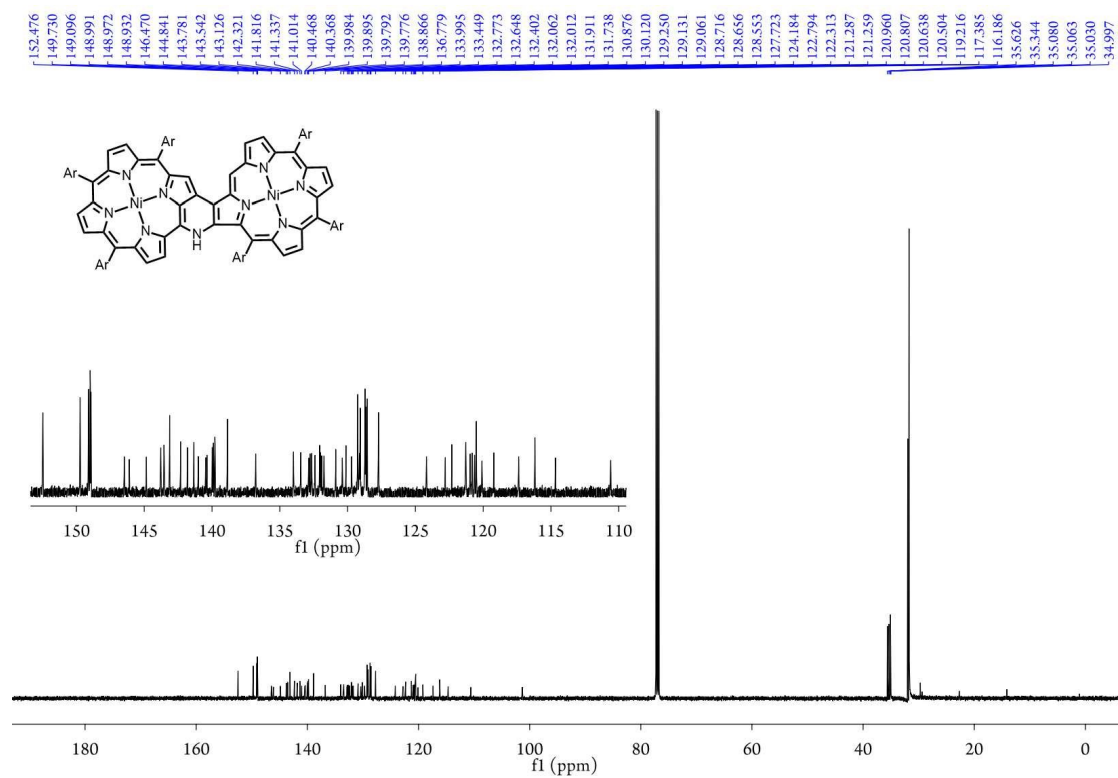

Figure S6.  $^{13}\text{C}$  NMR spectrum of **9** in  $\text{CDCl}_3$  at 298 K

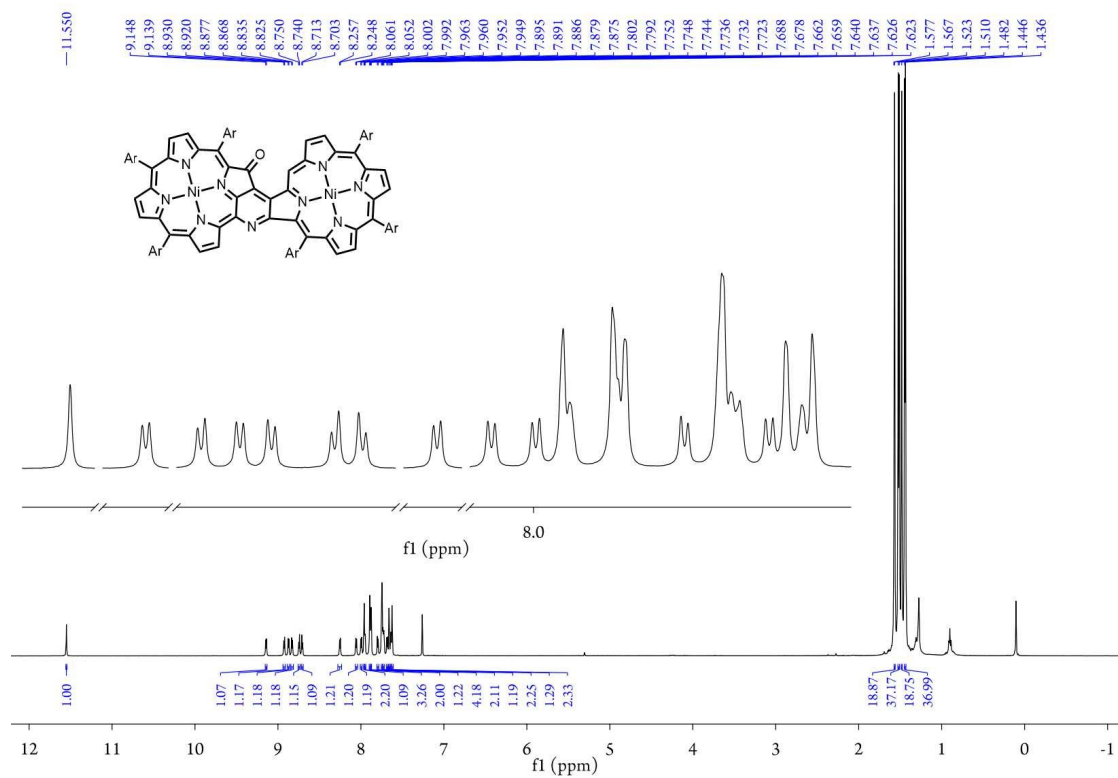

**Figure S7.**  $^1\text{H}$  NMR spectrum of **10** in  $\text{CDCl}_3$  at 298 K

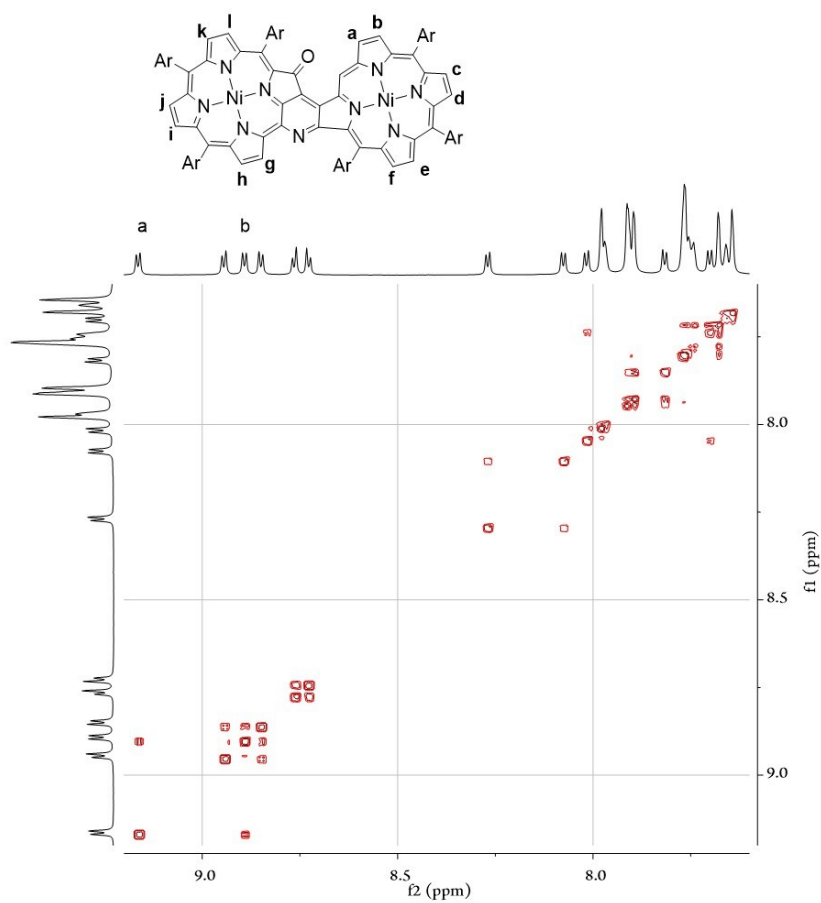

**Figure S8.**  $^1\text{H}$ - $^1\text{H}$  COSY spectrum of **10** (9.20-7.60 ppm) in  $\text{CDCl}_3$  at 298 K

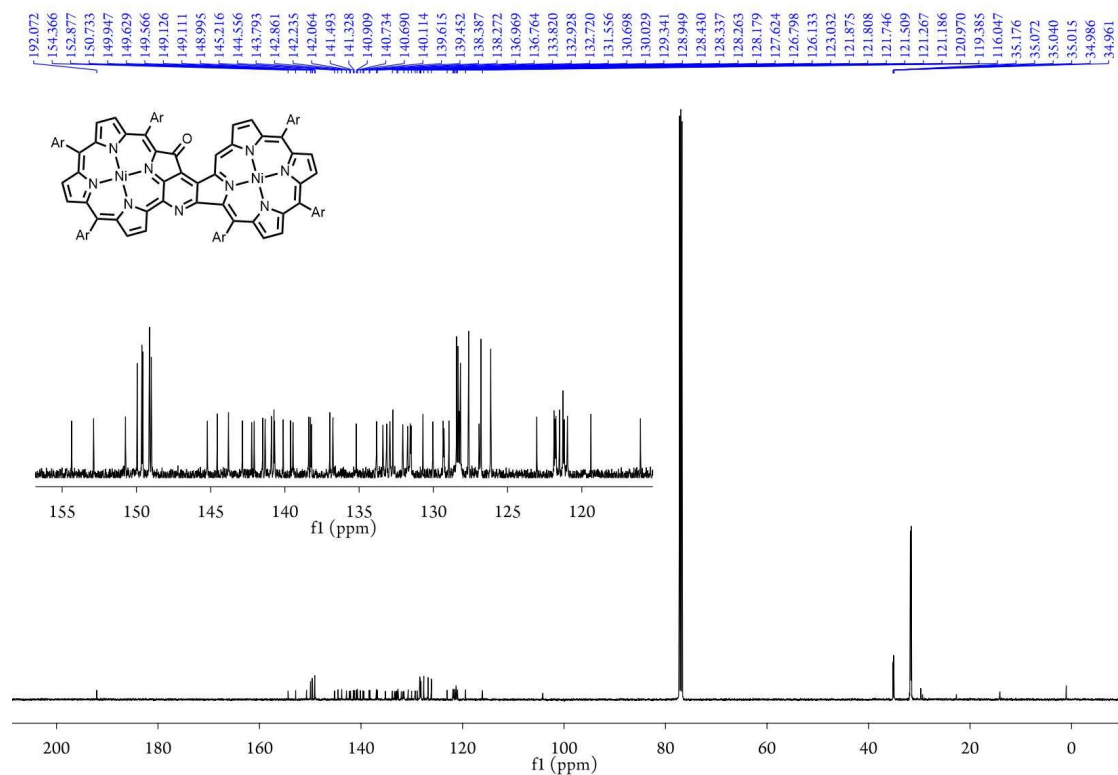

**Figure S9.**  $^{13}\text{C}$  NMR spectrum of **10** in  $\text{CDCl}_3$  at 298 K

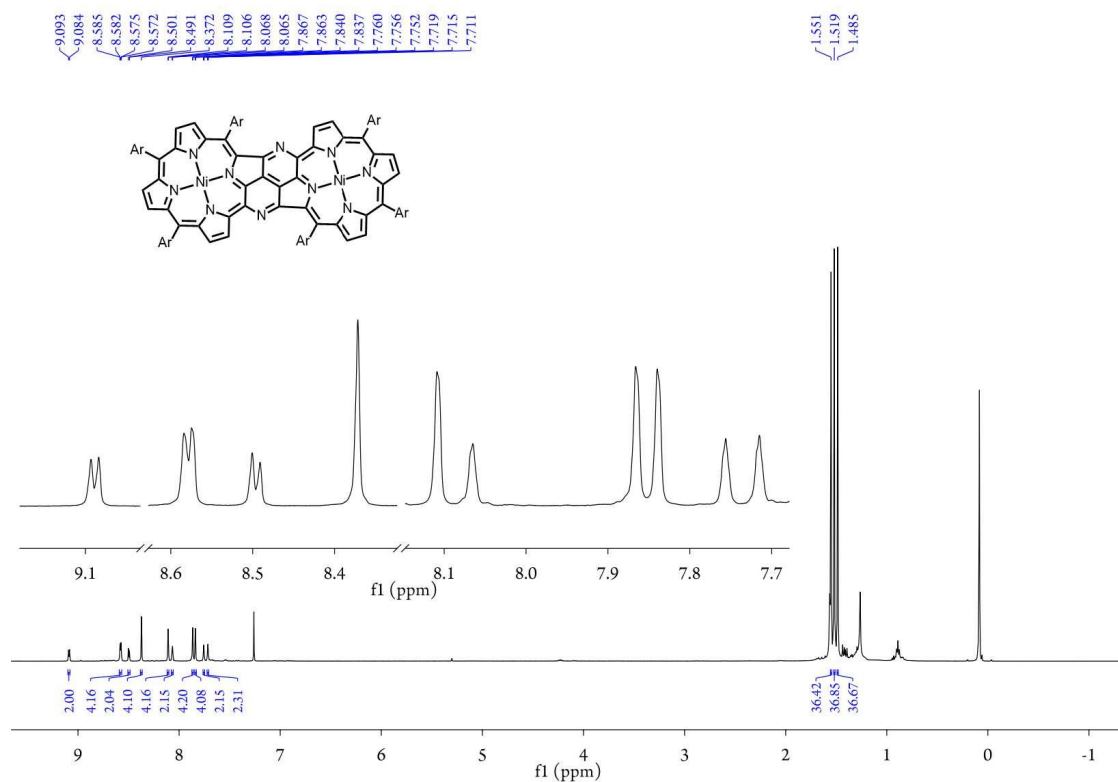

**Figure S10.**  $^1\text{H}$  NMR spectrum of **11** in  $\text{CDCl}_3$  at 298 K

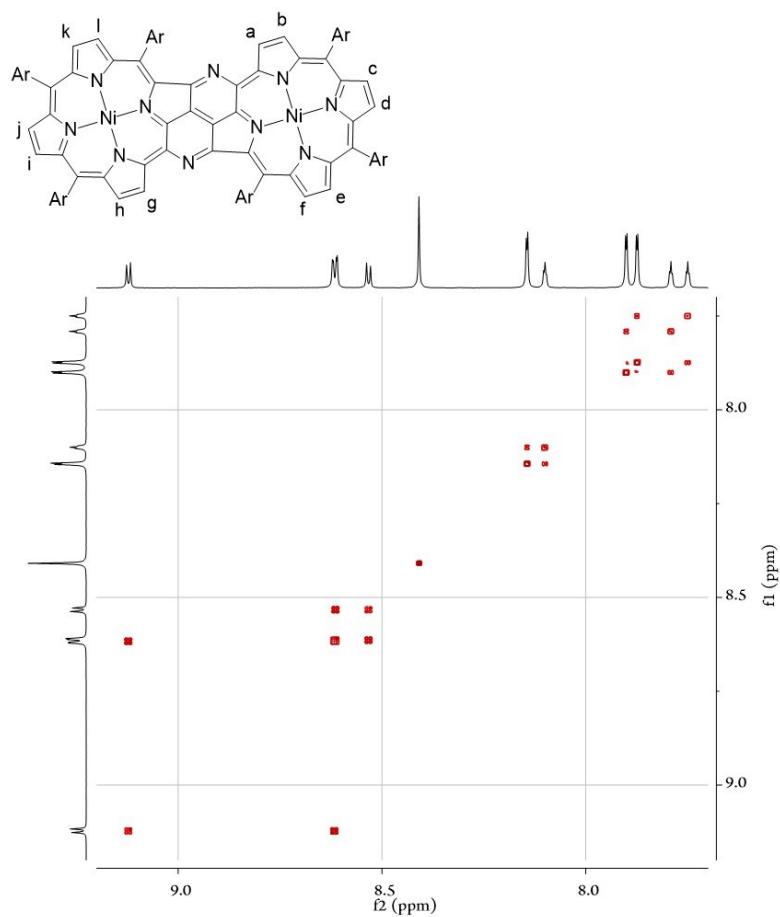

Figure S11.  $^1\text{H}$ - $^1\text{H}$  COSY spectrum of **11** (9.30-7.70 ppm) in  $\text{CDCl}_3$  at 298 K

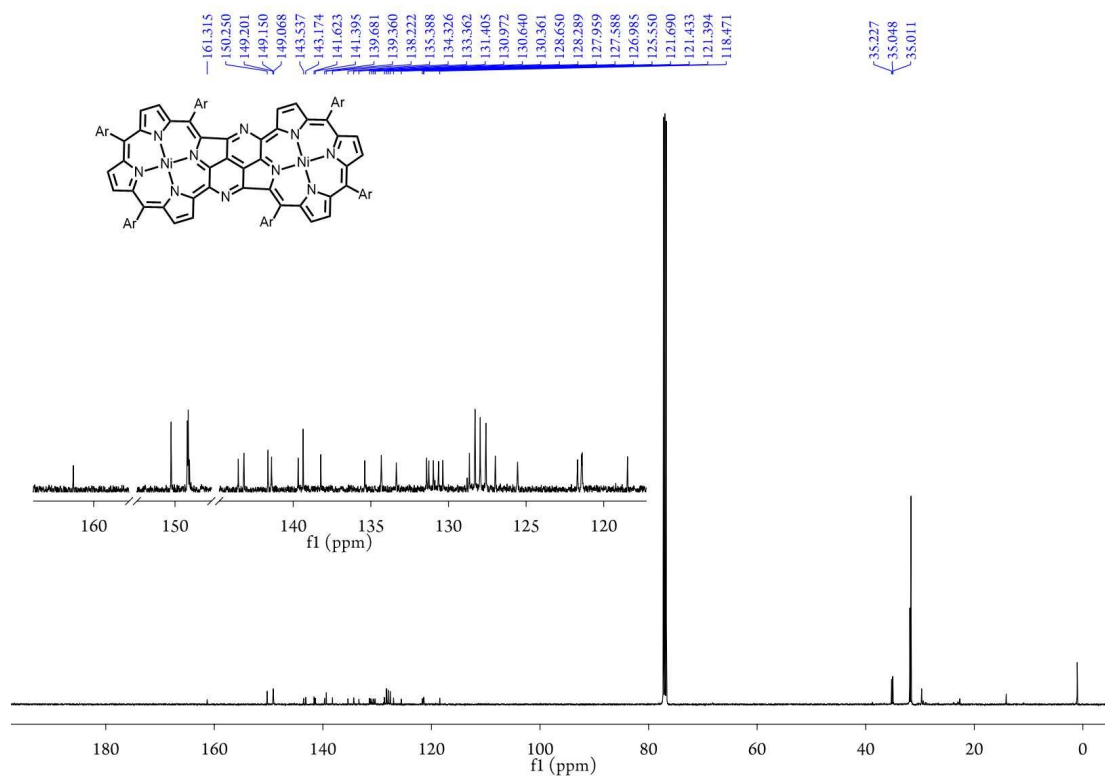

Figure S12.  $^{13}\text{C}$  NMR spectrum of **11** in  $\text{CDCl}_3$  at 298 K

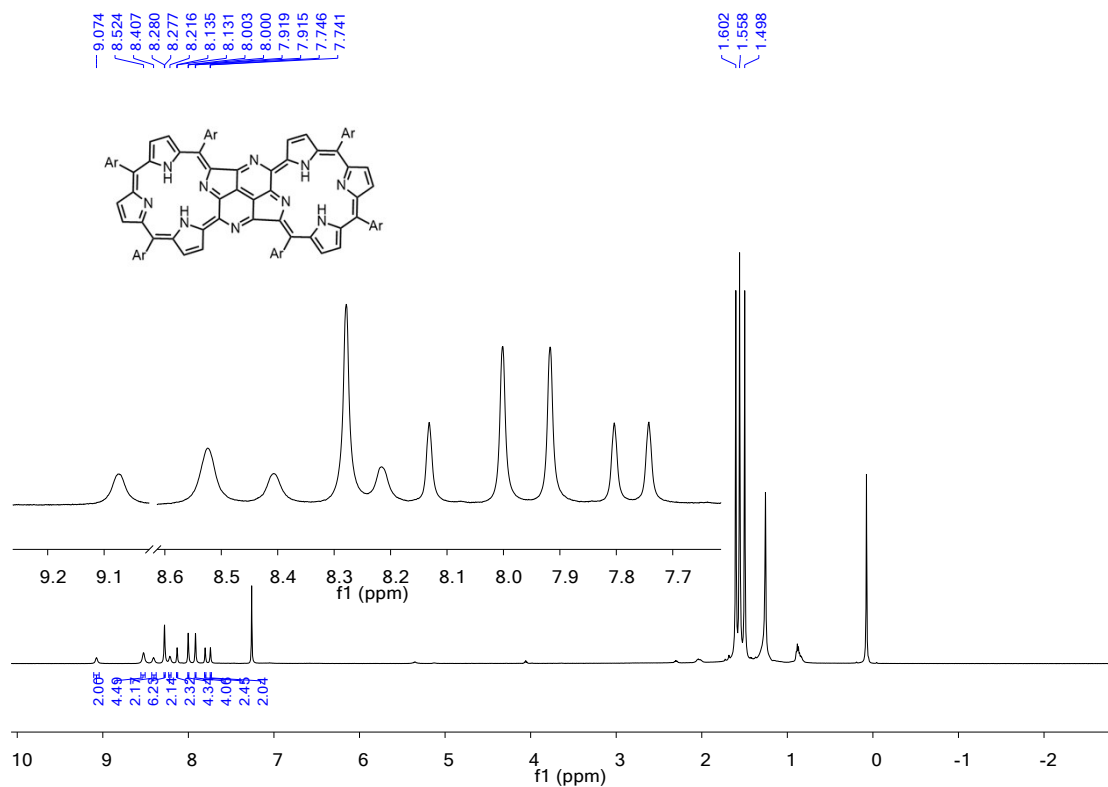

**Figure S13.**  $^1\text{H}$  NMR spectrum of **12** in  $\text{CDCl}_3$  at 298 K

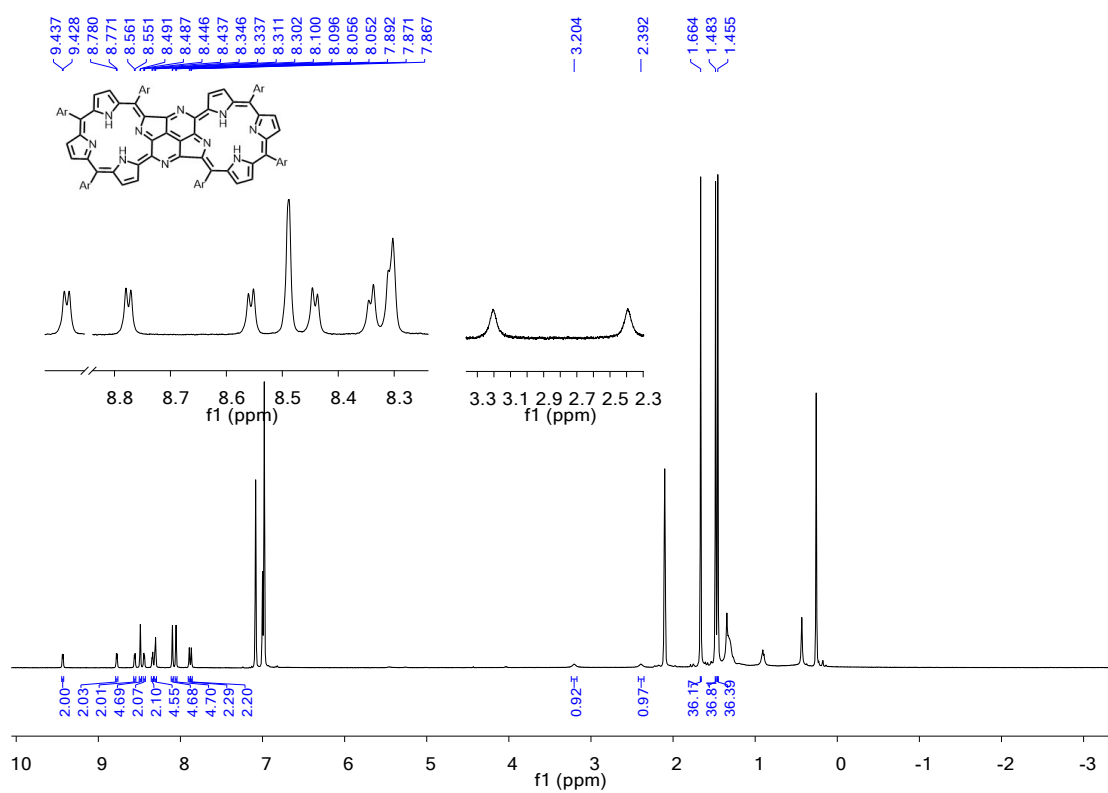

**Figure S14.**  $^1\text{H}$  NMR spectrum of **12** in  $\text{toluene-}d_8$  at 353 K

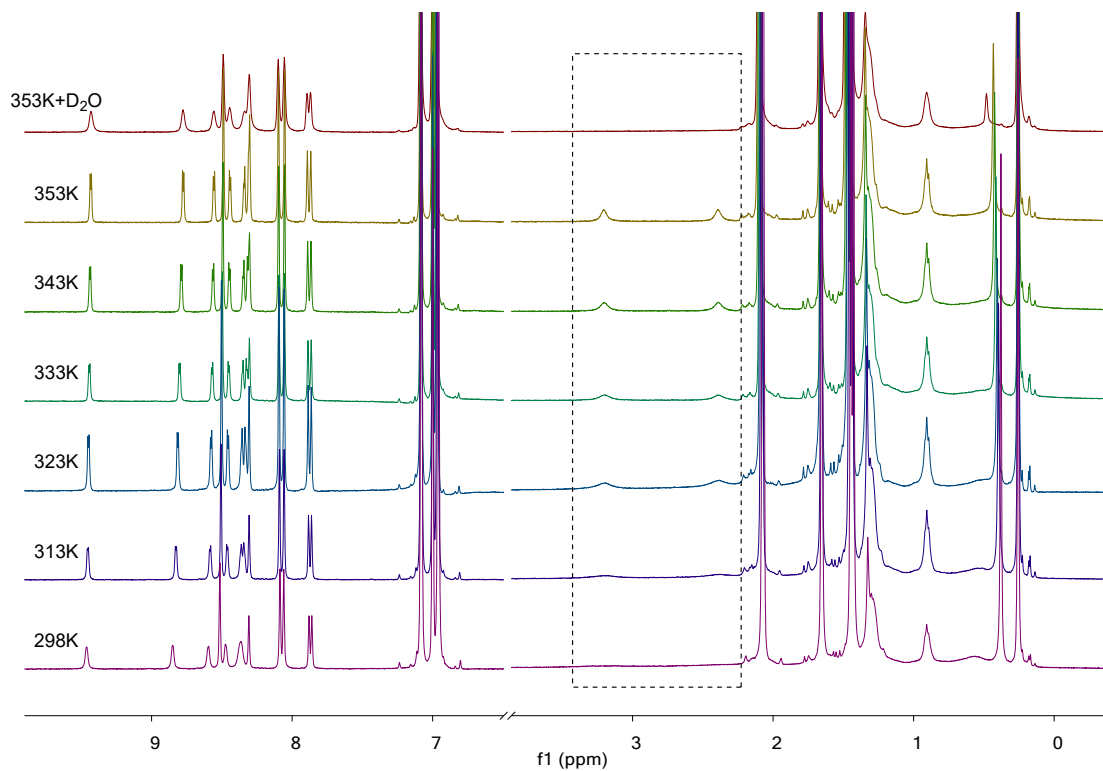

**Figure S15.** VT-<sup>1</sup>H NMR spectra of **12** in toluene-*d*<sub>8</sub> from 298 to 353 K and **12** with D<sub>2</sub>O at 353 K

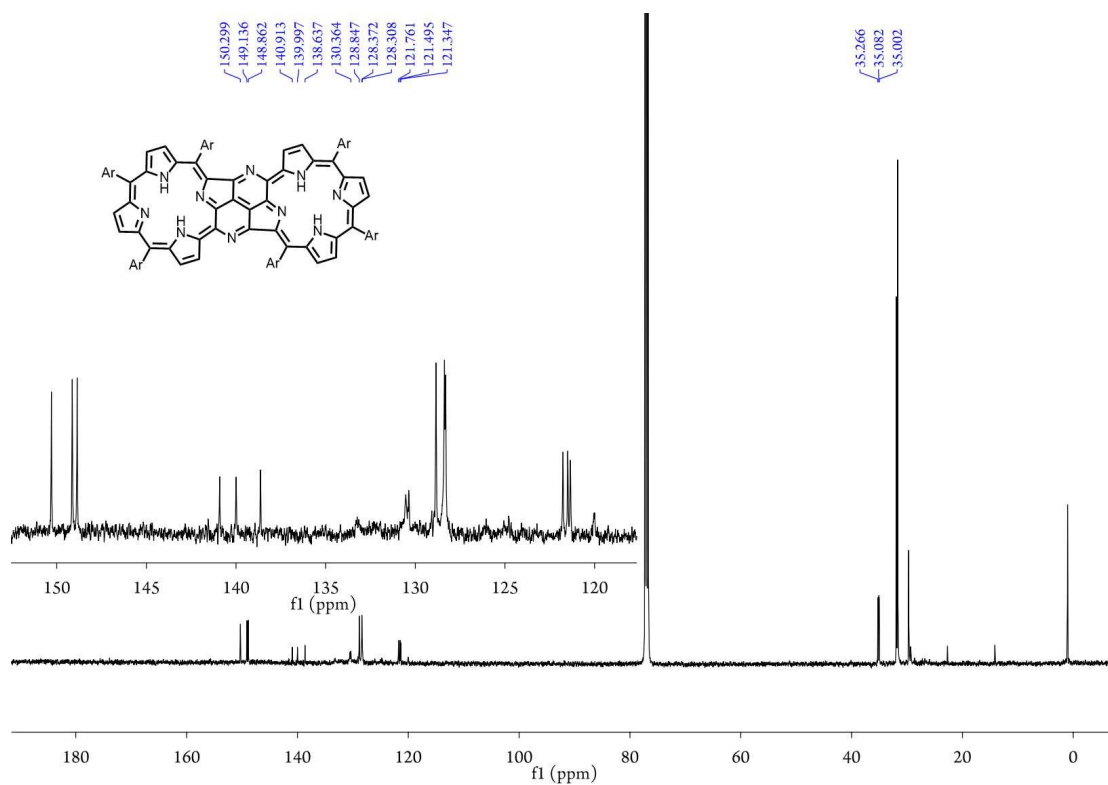

**Figure S16.** <sup>13</sup>C NMR spectrum of **12** in CDCl<sub>3</sub> at 298 K

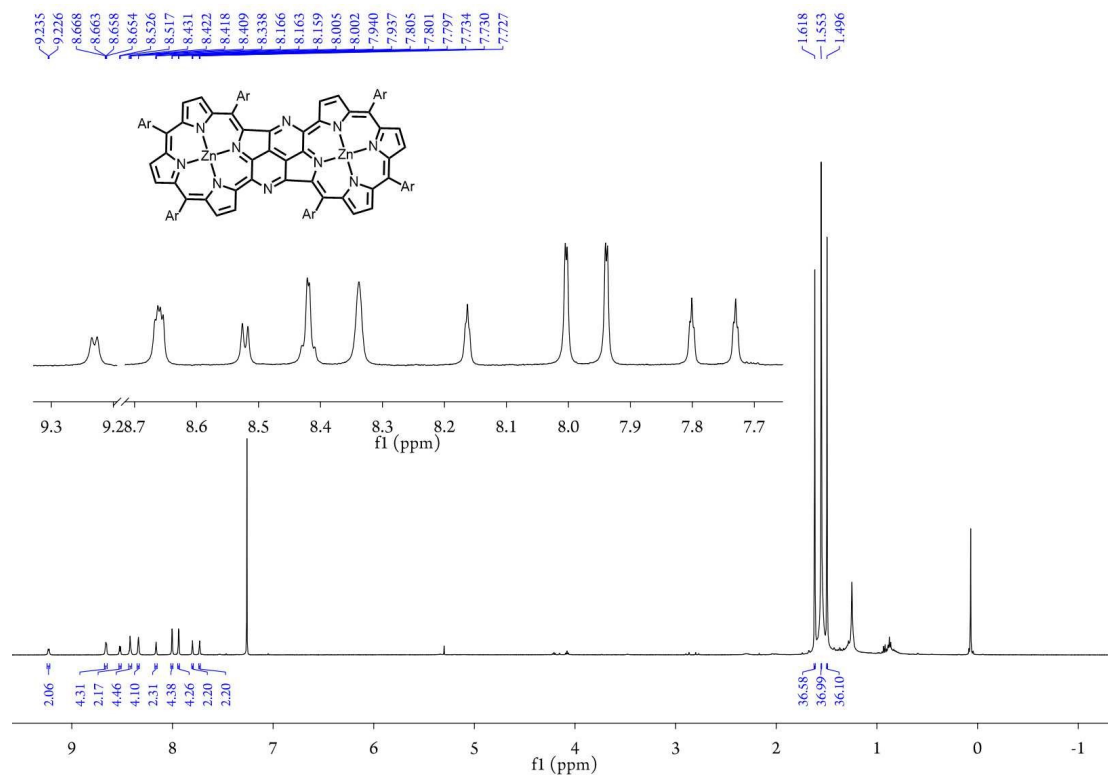

**Figure S17.**  $^1\text{H}$  NMR spectrum of **13** in  $\text{CDCl}_3$  at 298 K

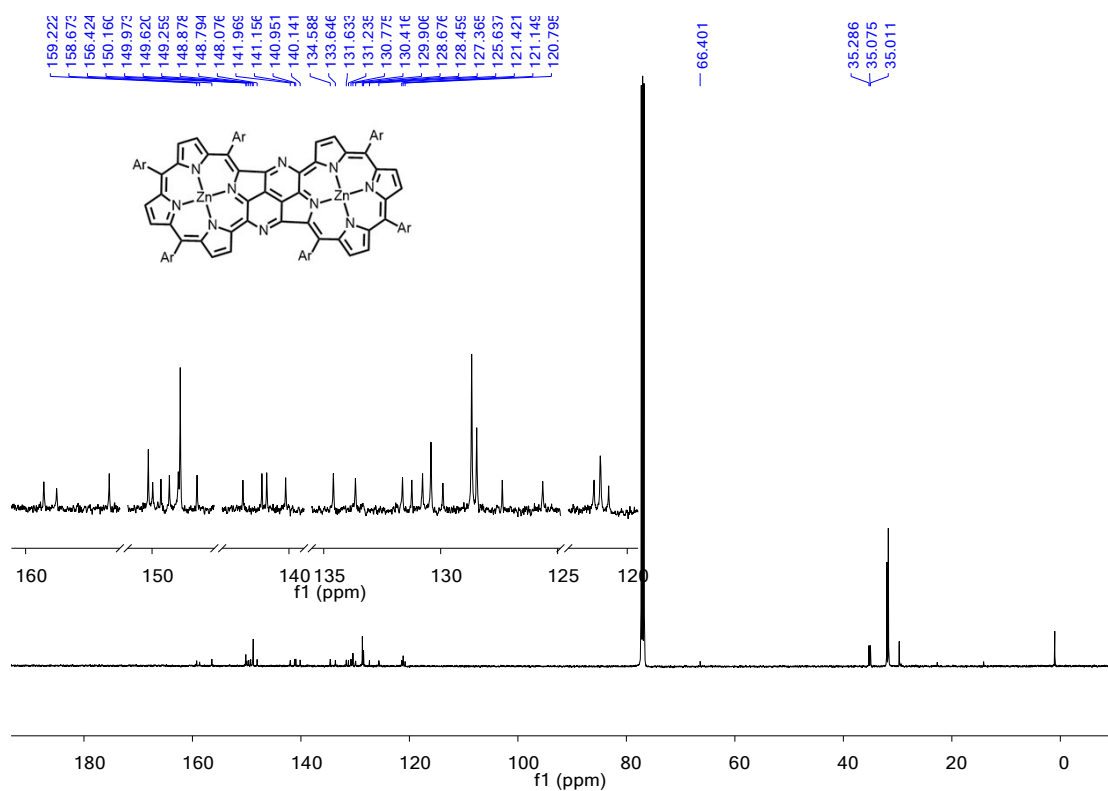

**Figure S18.**  $^{13}\text{C}$  NMR spectrum of **13** in  $\text{CDCl}_3$  at 298 K

#### 4. MALDI-TOF mass spectra

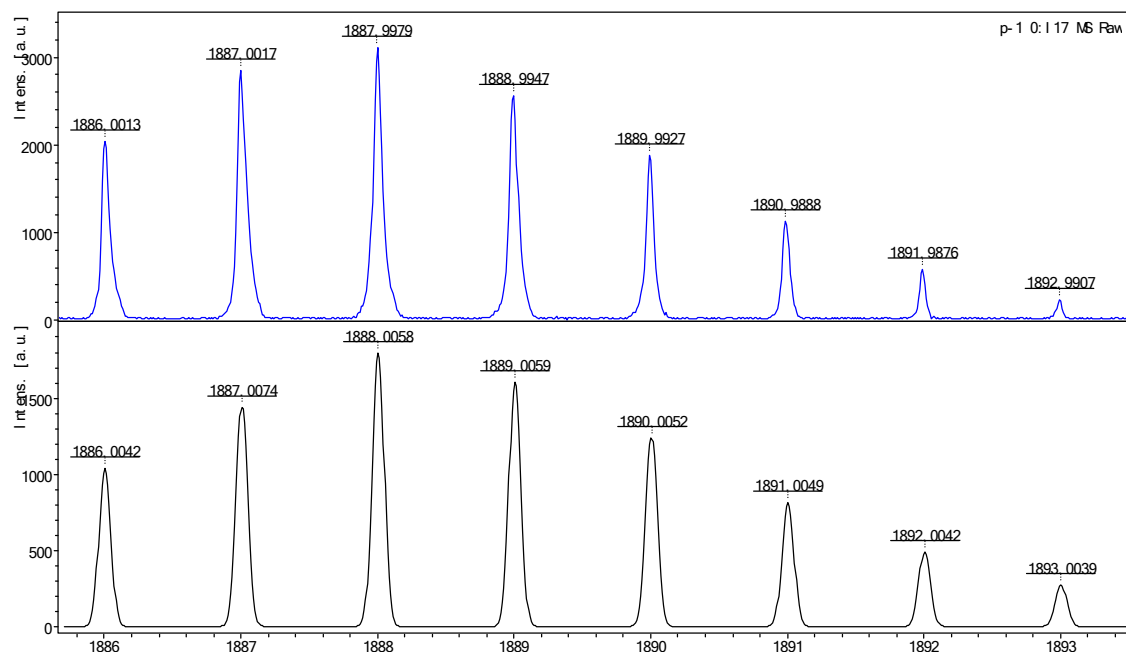

Figure S19. Observed (top) and simulated (bottom) HR-MALDI-TOF mass spectra of **8**

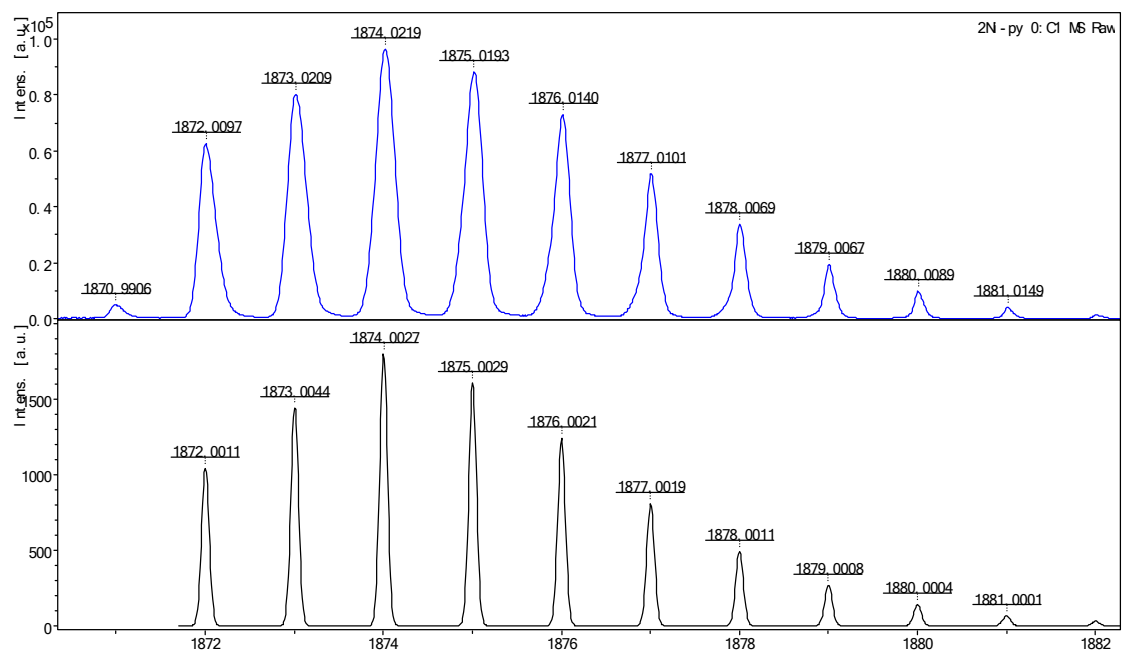

Figure S20. Observed (top) and simulated (bottom) HR-MALDI-TOF mass spectra of **9**



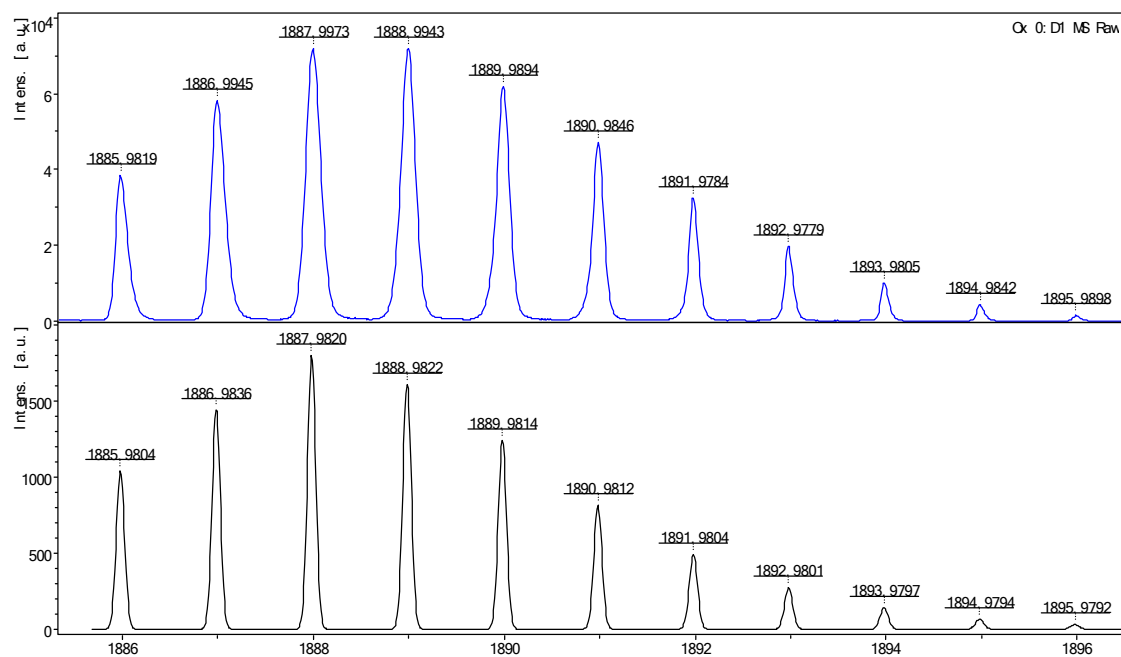

**Figure S21.** Observed (top) and simulated (bottom) HR-MALDI-TOF mass spectra of **10**

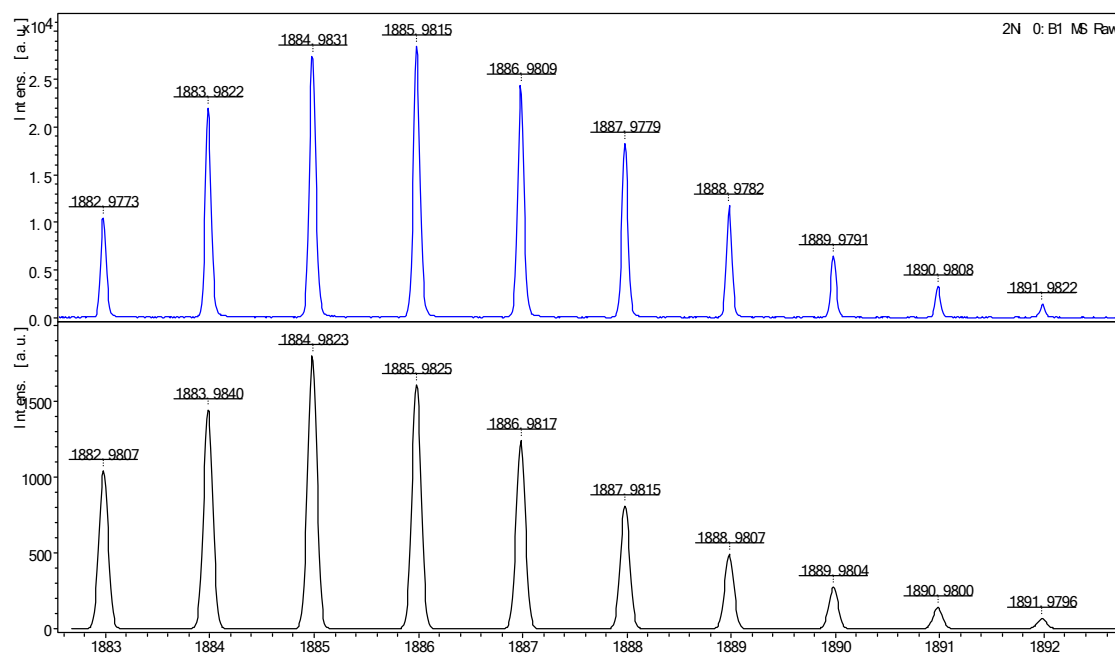

**Figure S22.** Observed (top) and simulated (bottom) HR-MALDI-TOF mass spectra of **11**

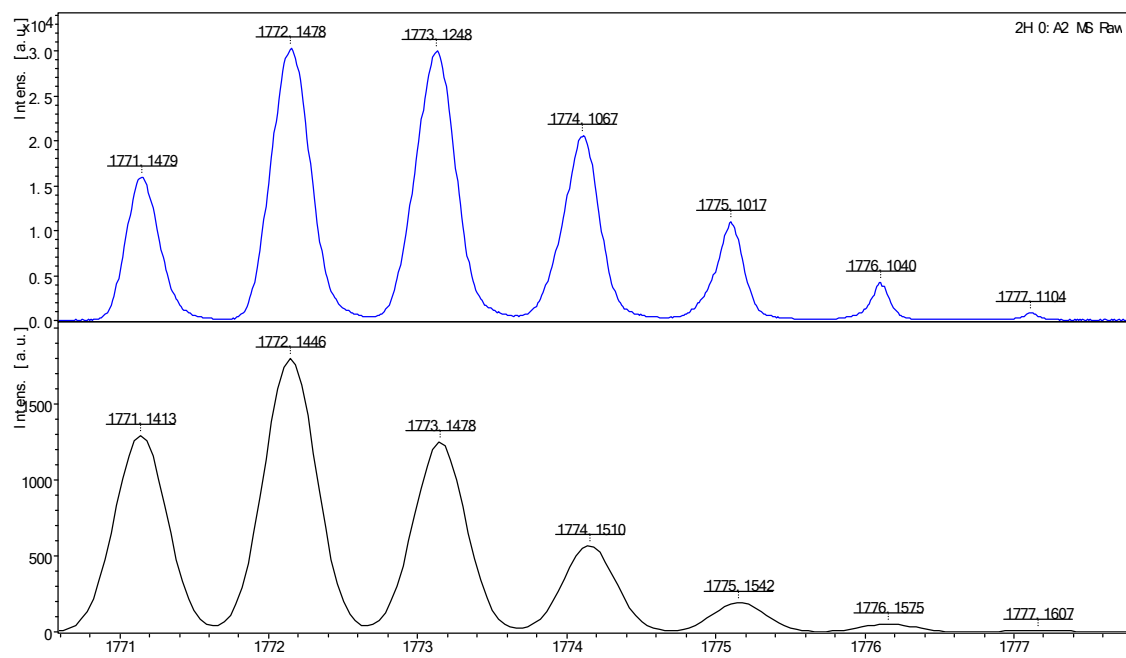

**Figure S23.** Observed (top) and simulated (bottom) HR-MALDI-TOF mass spectra of **12**

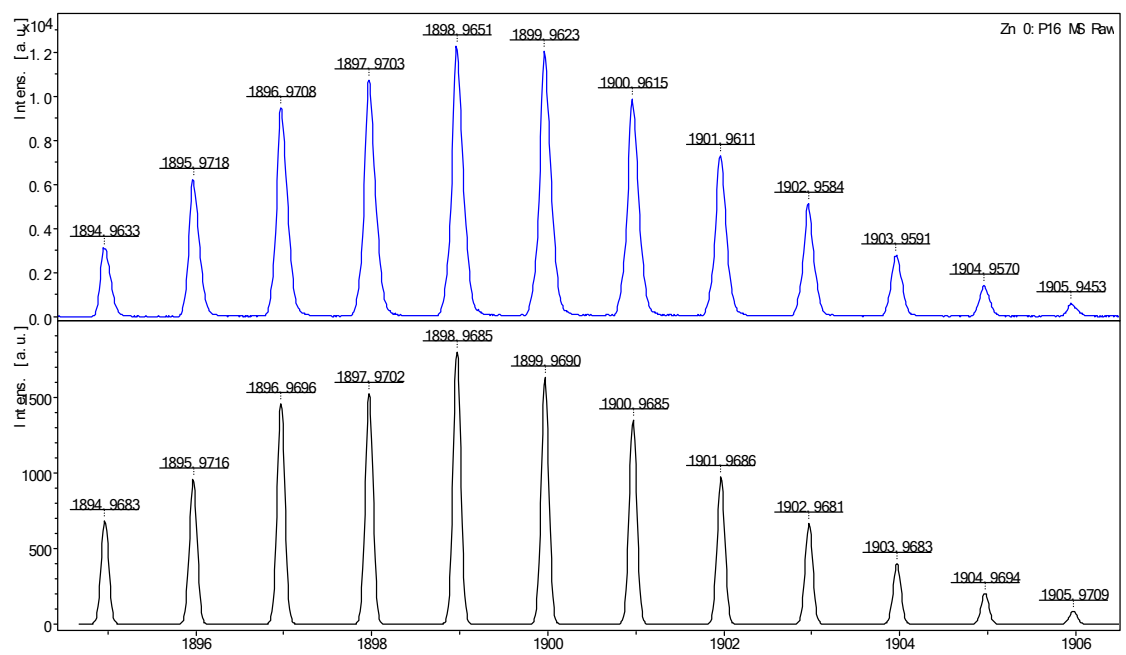

**Figure S24.** Observed (top) and simulated (bottom) HR-MALDI-TOF mass spectra of **13**

## 5. UV/Vis/NIR absorption spectra and data

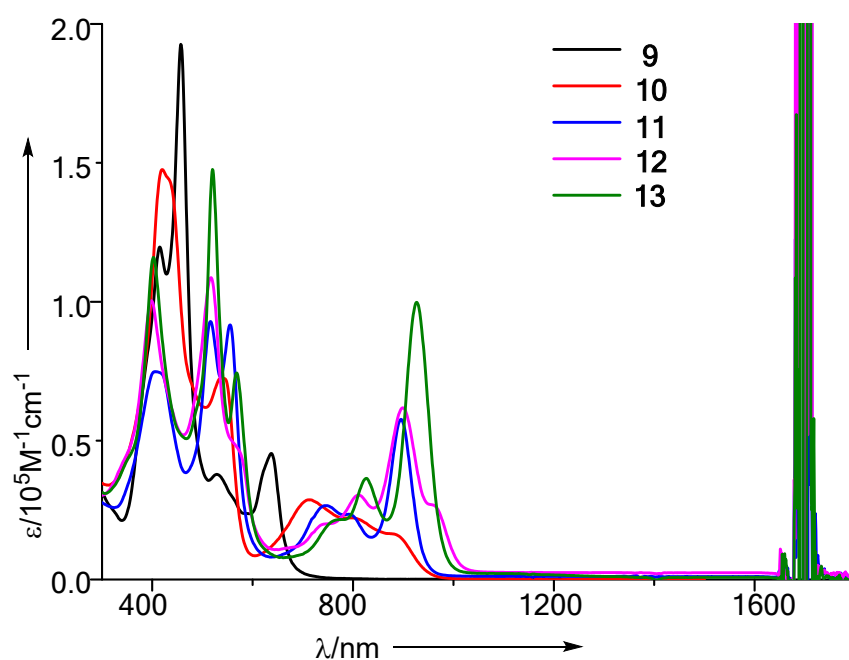

**Figure S25.** Absorption spectra of fused porphyrin dimers **9-13** in CH<sub>2</sub>Cl<sub>2</sub>

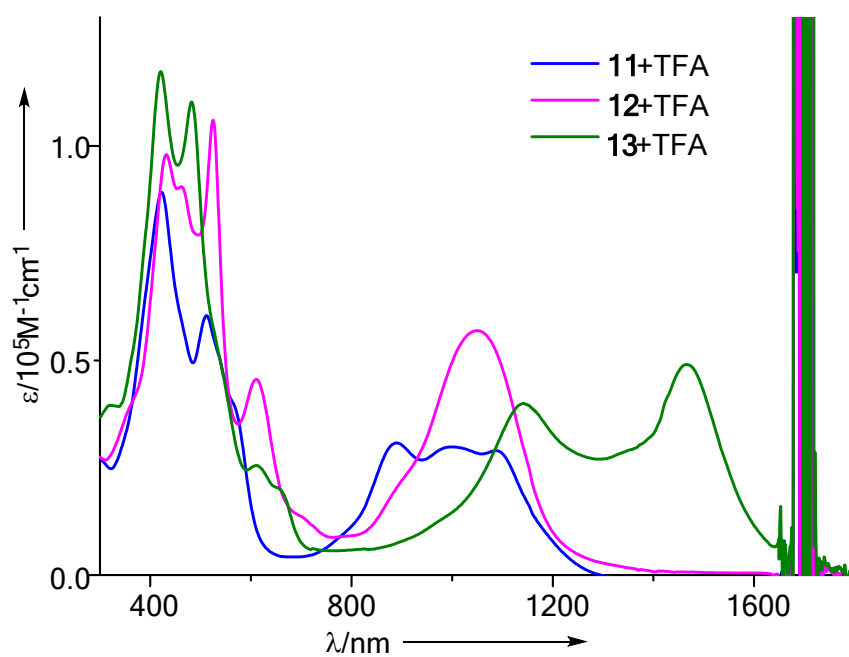

**Figure S26.** Absorption spectra of **11+TFA**, **12+TFA**, and **13+TFA** in CH<sub>2</sub>Cl<sub>2</sub>

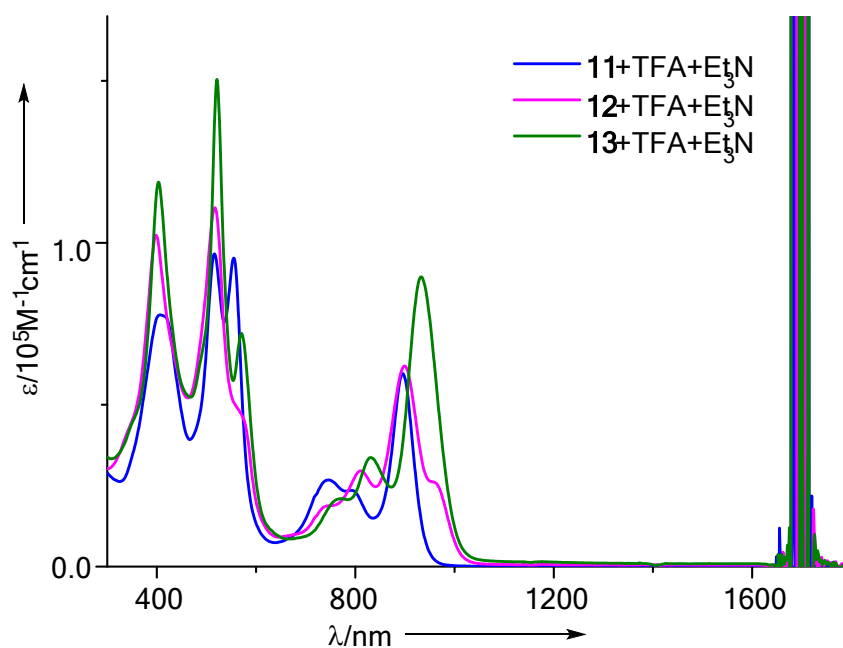

**Figure S27.** Absorption spectra of **11**+TFA+Et<sub>3</sub>N, **12**+TFA+ Et<sub>3</sub>N, and **13**+TFA+ Et<sub>3</sub>N in CH<sub>2</sub>Cl<sub>2</sub>

**Table S1.** UV/Vis/NIR absorption spectra data

| Compounds                         | $\lambda_{\text{abs}}/\text{nm}$ ( $\epsilon/10^5 \text{ M}^{-1} \text{ cm}^{-1}$ ) |
|-----------------------------------|-------------------------------------------------------------------------------------|
| <b>9</b>                          | 415 (1.20), 457 (1.93), 529 (0.38), 637 (0.45)                                      |
| <b>10</b>                         | 420 (1.48), 537 (0.72), 711 (0.29), 796 (0.22)                                      |
| <b>11</b>                         | 404 (0.75), 516 (0.93), 555 (0.92), 745 (0.27), 896 (0.58)                          |
| <b>12</b>                         | 398 (1.00), 517 (1.09), 811 (0.30), 899 (0.62)                                      |
| <b>13</b>                         | 402 (1.16), 520 (1.48), 568 (0.74), 827 (0.36), 927 (1.00)                          |
| <b>11</b> +TFA                    | 423 (0.89), 512 (0.60), 890 (0.31), 996 (0.30), 1087 (0.29)                         |
| <b>12</b> +TFA                    | 432 (0.98), 462 (0.91), 525 (1.06), 611 (0.46), 1050 (0.57)                         |
| <b>13</b> +TFA                    | 321 (0.40), 421 (1.17), 482 (1.10), 612 (0.26), 1142 (0.40),<br>1465 (0.49)         |
| <b>11</b> +TFA+Et <sub>3</sub> N  | 406 (0.78), 516 (0.97), 555 (0.95), 746 (0.27), 896 (0.60)                          |
| <b>12</b> +TFA+ Et <sub>3</sub> N | 398 (1.02), 517 (1.11), 811 (0.30), 899 (0.62)                                      |
| <b>13</b> +TFA+ Et <sub>3</sub> N | 403 (1.19), 521 (1.50), 570 (0.72), 831 (0.34), 933 (0.89)                          |

## 6. Electrochemical properties

Cyclic voltammetry was performed in a three-electrode cell using the Chi-610E electrochemistry station. A three-electrode cell was used for cyclic voltammetric measurements, consisting of a platinum or glassy carbon working electrode, a Pt wire counter electrode and a Ag/AgNO<sub>3</sub> supporting electrolyte reference electrode. 0.1 M *n*-Bu<sub>4</sub>NPF<sub>6</sub> in dichloromethane was used as supporting electrolyte.

**Table S2.** Electrochemical data.<sup>a</sup>

| Compounds | $E_{\text{ox.2}}$ (V) | $E_{\text{ox.1}}$ (V) | $E_{\text{red.1}}$ (V) | $E_{\text{red.2}}$ (V) | $\Delta E_{\text{HL}}$ (eV) <sup>b</sup> |
|-----------|-----------------------|-----------------------|------------------------|------------------------|------------------------------------------|
| <b>9</b>  | -                     | 0.09                  | -1.69                  | -                      | 1.78                                     |
| <b>10</b> | 0.73                  | 0.45                  | -0.97                  | -1.42                  | 1.42                                     |
| <b>11</b> | 0.64                  | 0.33                  | -1.07                  | -1.34                  | 1.40                                     |

<sup>a</sup>Potentials were determined vs ferrocene/ferrocenium ion by differential pulse voltammograms; Scan rate: 0.05 V/s; working electrode: glassy carbon; counter electrode: Pt wire; reference electrode: Ag/AgNO<sub>3</sub> supporting electrolyte: 0.1 M *n*-Bu<sub>4</sub>NPF<sub>6</sub> in CH<sub>2</sub>Cl<sub>2</sub>. <sup>b</sup>Electrochemical HOMO-LUMO gaps ( $\Delta E_{\text{HL}} = e (E_{\text{ox.1}} - E_{\text{red.1}})$  [eV]).

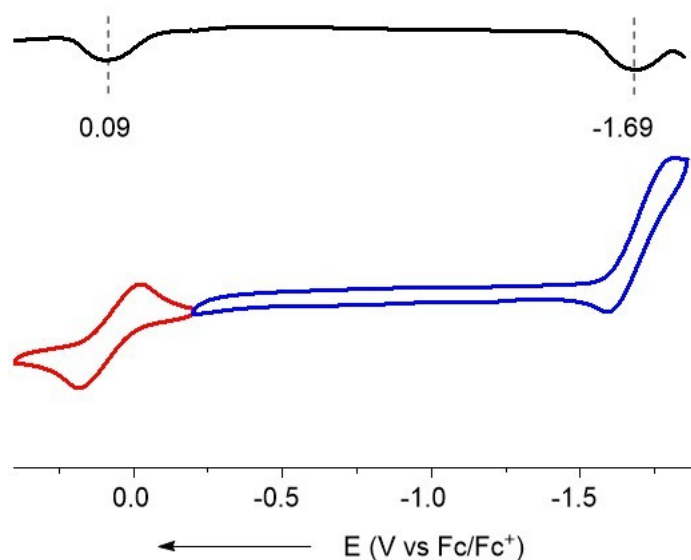

**Figure S28.** Cyclic voltammograms and differential pulse voltammograms of **9**

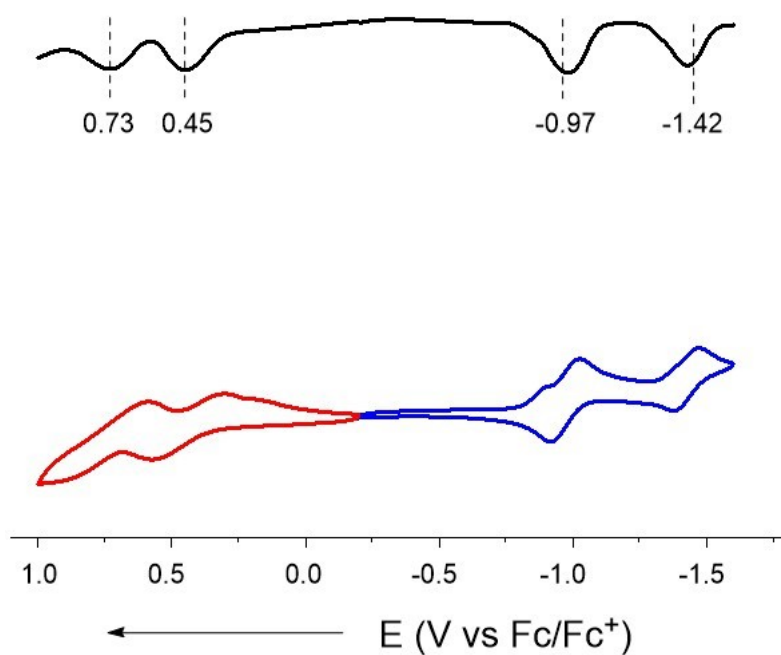

**Figure S29.** Cyclic voltammograms and differential pulse voltammograms of **10**

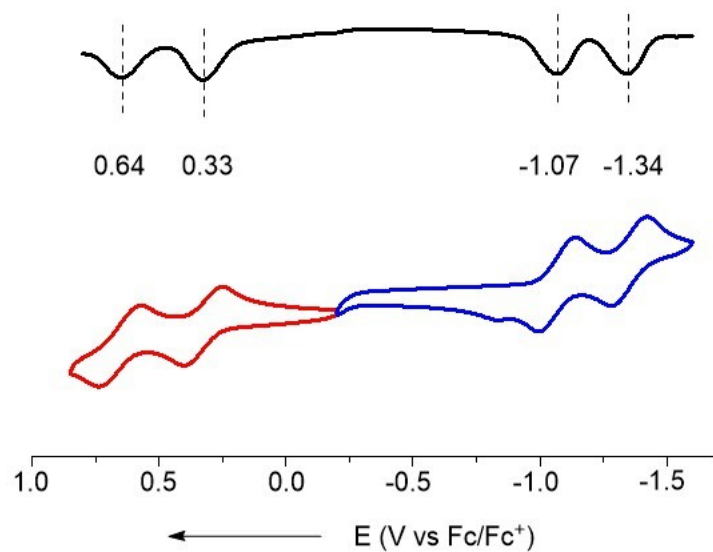

**Figure S30.** Cyclic voltammograms and differential pulse voltammograms of **11**

## 7. DFT calculations

All calculations were carried out using the Gaussian 09 program. Initial geometries of **9**, **10**, and **13** were from the corresponding X-ray structures. The structure was optimized without any symmetry restriction. Geometry optimization in the ground state were performed by the density functional theory (DFT) with B3LYP (Becke's three-parameter hybrid exchange functionals and the Lee-Yang-Parr correlation functional) level employing a basis set of 6-31G(d) for all of the atoms.<sup>[S2]</sup>

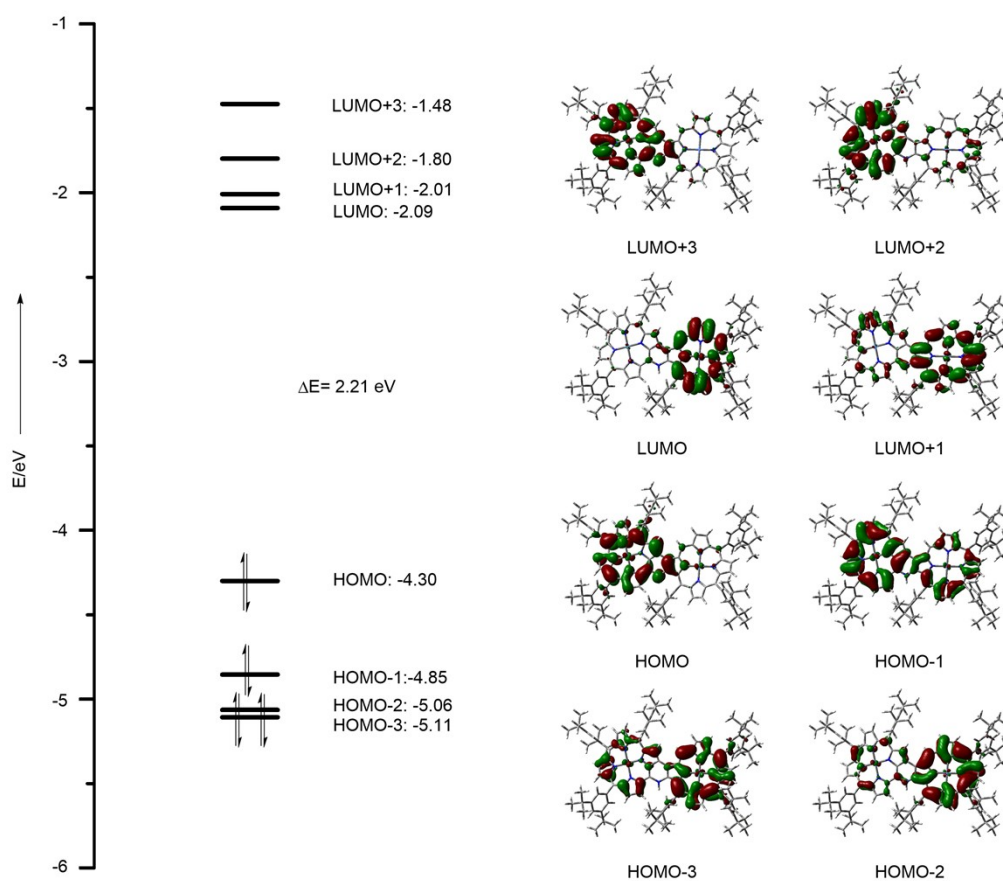

**Figure S31.** Frontier molecular orbitals and orbital energies of **9**

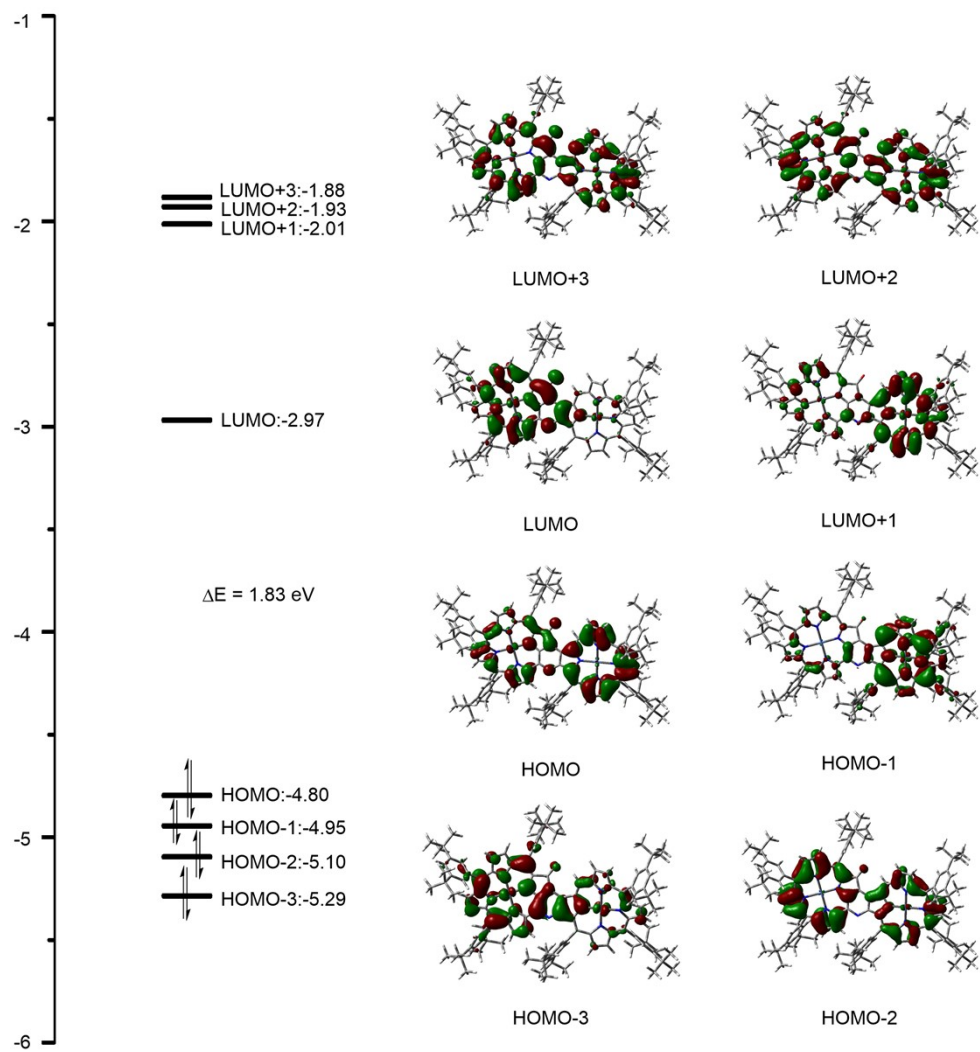

**Figure S32.** Frontier molecular orbitals and orbital energies of **10**



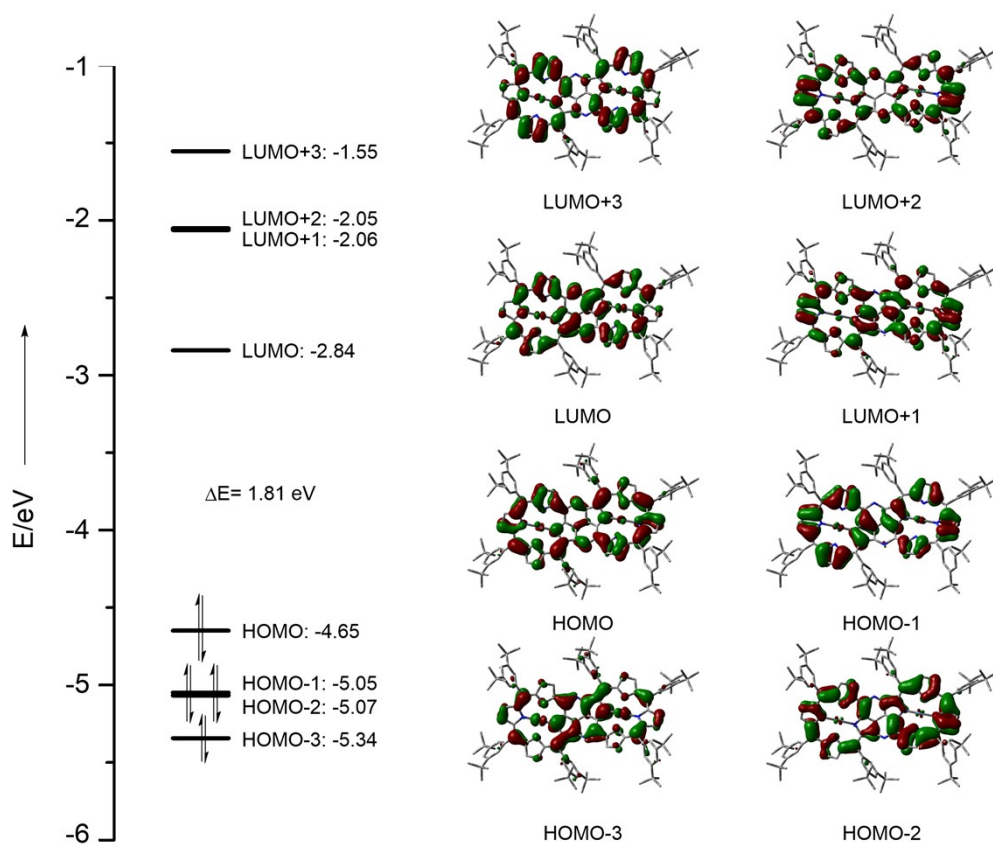

**Figure S33.** Frontier molecular orbitals and orbital energies of **11**

## 8. X-ray crystal structures and data

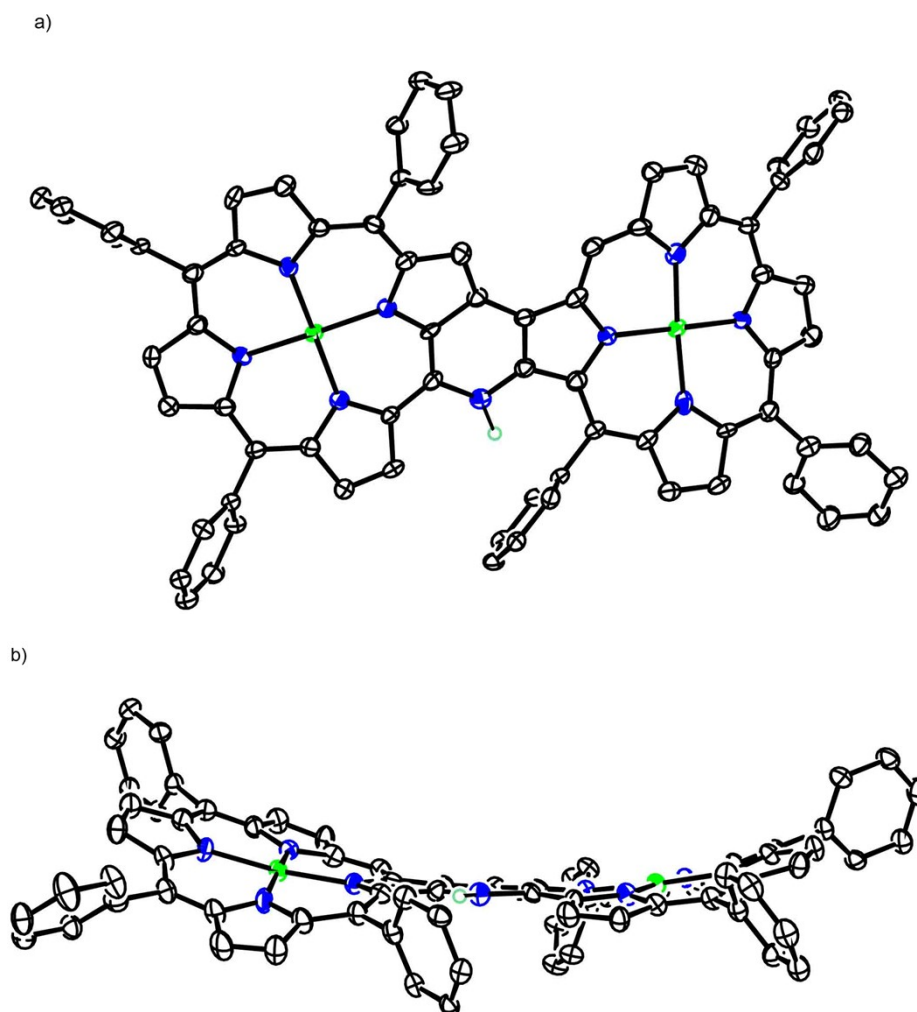

**Figure S34.** X-ray crystal structure of **9**: a) top view, b) side view. The thermal ellipsoids are 50% probability level. H atoms except for the N-H, alkyl groups and solvent molecules are omitted for clarity

**Table S3.** Crystal data and structure refinement for **9**

|                      |                                                                  |                       |
|----------------------|------------------------------------------------------------------|-----------------------|
| Identification code  | exp_2089_sq                                                      |                       |
| Empirical formula    | C <sub>124</sub> H <sub>141</sub> N <sub>9</sub> Ni <sub>2</sub> |                       |
| Formula weight       | 1872.00                                                          |                       |
| Temperature          | 100.01(10) K                                                     |                       |
| Wavelength           | 1.54184 Å                                                        |                       |
| Crystal system       | Monoclinic                                                       |                       |
| Space group          | P 1 21/c 1                                                       |                       |
| Unit cell dimensions | a = 15.0711(8) Å                                                 | $\alpha = 90^\circ$ . |

|                                        |                                                              |                             |
|----------------------------------------|--------------------------------------------------------------|-----------------------------|
|                                        | $b = 17.7558(9) \text{ \AA}$                                 | $\beta = 97.378(6)^\circ$ . |
|                                        | $c = 47.125(4) \text{ \AA}$                                  | $\gamma = 90^\circ$ .       |
| Volume                                 | $12506.3(14) \text{ \AA}^3$                                  |                             |
| Z                                      | 4                                                            |                             |
| Density (calculated)                   | $0.996 \text{ Mg/m}^3$                                       |                             |
| Absorption coefficient                 | $0.714 \text{ mm}^{-1}$                                      |                             |
| F(000)                                 | 4016                                                         |                             |
| Crystal size                           | $0.2 \times 0.1 \times 0.1 \text{ mm}^3$                     |                             |
| Theta range for data collection        | $2.662 \text{ to } 66.600^\circ$                             |                             |
| Index ranges                           | $-17 \leq h \leq 16, -21 \leq k \leq 14, -52 \leq l \leq 56$ |                             |
| Reflections collected                  | 43654                                                        |                             |
| Independent reflections                | 22054 [R(int) = 0.1052]                                      |                             |
| Completeness to theta = $66.600^\circ$ | 99.8 %                                                       |                             |
| Absorption correction                  | Semi-empirical from equivalents                              |                             |
| Max. and min. transmission             | 1.00000 and 0.31241                                          |                             |
| Refinement method                      | Full-matrix least-squares on $F^2$                           |                             |
| Data / restraints / parameters         | 22055 / 0 / 1256                                             |                             |
| Goodness-of-fit on $F^2$               | 0.967                                                        |                             |
| Final R indices [ $I > 2\sigma(I)$ ]   | R1 = 0.0843, wR2 = 0.1898                                    |                             |
| R indices (all data)                   | R1 = 0.1581, wR2 = 0.2468                                    |                             |
| Extinction coefficient                 | n/a                                                          |                             |
| Largest diff. peak and hole            | 0.580 and $-0.483 \text{ e.\AA}^{-3}$                        |                             |

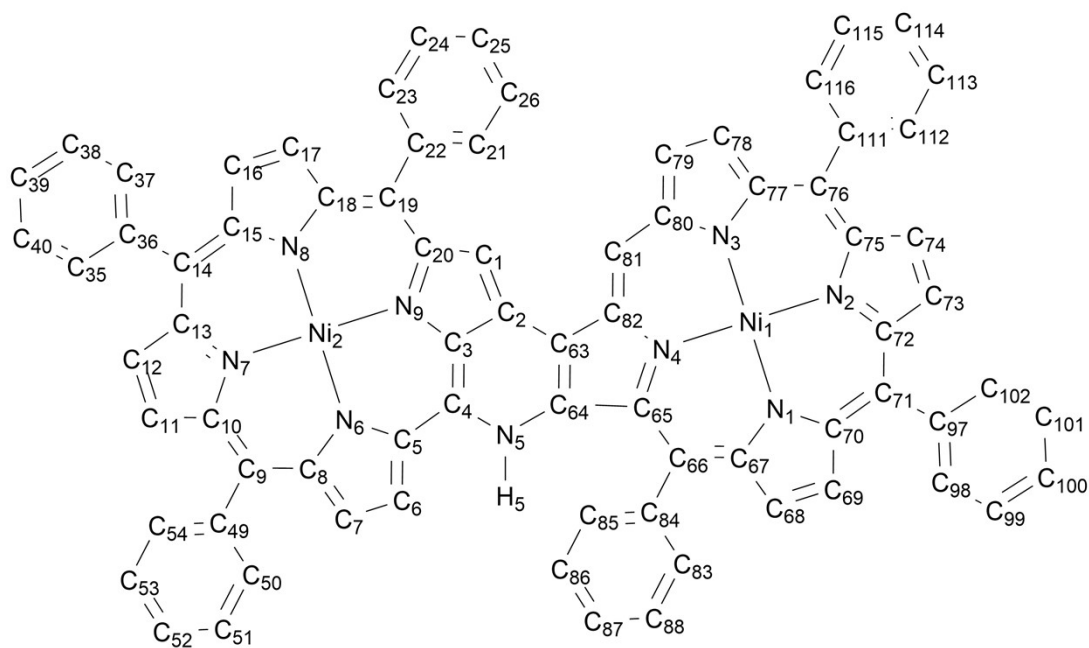

**Table S4.** bond lengths (Å) and angles (°) for **9**

|            |          |             |          |
|------------|----------|-------------|----------|
| Ni(1)-N(1) | 1.933(5) | C(10)-C(11) | 1.434(8) |
| Ni(1)-N(2) | 1.939(4) | C(11)-C(12) | 1.338(8) |
| Ni(1)-N(3) | 1.935(4) | C(12)-C(13) | 1.449(7) |
| Ni(1)-N(4) | 1.960(4) | C(13)-C(14) | 1.388(7) |
| Ni(2)-N(6) | 1.939(4) | C(14)-C(15) | 1.370(7) |
| Ni(2)-N(7) | 1.932(4) | C(14)-C(36) | 1.483(7) |
| Ni(2)-N(8) | 1.925(4) | C(15)-C(16) | 1.434(7) |
| Ni(2)-N(9) | 1.945(4) | C(16)-C(17) | 1.359(8) |
| N(1)-C(67) | 1.389(7) | C(17)-C(18) | 1.434(7) |
| N(1)-C(70) | 1.372(7) | C(18)-C(19) | 1.363(8) |
| N(2)-C(72) | 1.379(7) | C(19)-C(20) | 1.405(7) |
| N(2)-C(75) | 1.394(7) | C(19)-C(22) | 1.502(6) |
| N(3)-C(77) | 1.396(7) | C(21)-C(22) | 1.387(7) |
| N(3)-C(80) | 1.364(7) | C(21)-C(26) | 1.407(7) |
| N(4)-C(65) | 1.397(7) | C(22)-C(23) | 1.409(7) |
| N(4)-C(82) | 1.362(7) | C(23)-C(24) | 1.408(7) |
| N(5)-H(5)  | 1.08(7)  | C(24)-C(25) | 1.385(7) |
| N(6)-C(5)  | 1.379(7) | C(25)-C(26) | 1.397(7) |
| N(6)-C(8)  | 1.412(6) | C(35)-C(36) | 1.389(7) |
| N(7)-C(10) | 1.397(6) | C(35)-C(40) | 1.401(8) |
| N(7)-C(13) | 1.372(7) | C(36)-C(37) | 1.408(7) |
| N(8)-C(15) | 1.395(7) | C(37)-C(38) | 1.391(8) |
| N(8)-C(18) | 1.405(6) | C(38)-C(39) | 1.390(8) |
| N(9)-C(3)  | 1.376(7) | C(39)-C(40) | 1.377(8) |
| N(9)-C(20) | 1.389(6) | C(49)-C(50) | 1.391(7) |
| C(1)-C(2)  | 1.380(7) | C(49)-C(54) | 1.397(7) |
| C(1)-C(20) | 1.415(8) | C(50)-C(51) | 1.402(7) |
| C(2)-C(3)  | 1.464(7) | C(51)-C(52) | 1.381(8) |
| C(2)-C(63) | 1.441(7) | C(52)-C(53) | 1.385(8) |
| C(3)-C(4)  | 1.364(7) | C(53)-C(54) | 1.401(7) |
| C(4)-C(5)  | 1.396(7) | C(63)-C(64) | 1.366(7) |
| C(5)-C(6)  | 1.410(7) | C(63)-C(82) | 1.445(8) |
| C(6)-C(7)  | 1.358(8) | C(64)-C(65) | 1.433(8) |
| C(7)-C(8)  | 1.418(7) | C(65)-C(66) | 1.364(7) |
| C(8)-C(9)  | 1.379(8) | C(66)-C(67) | 1.386(8) |
| C(9)-C(10) | 1.357(7) | C(66)-C(84) | 1.507(7) |
| C(9)-C(49) | 1.503(7) | C(67)-C(68) | 1.444(7) |

|                 |            |                  |            |
|-----------------|------------|------------------|------------|
| C(68)-C(69)     | 1.350(8)   | C(4)-N(5)-H(5)   | 137(4)     |
| C(69)-C(70)     | 1.436(7)   | C(64)-N(5)-H(5)  | 102(4)     |
| C(70)-C(71)     | 1.378(8)   | N(6)-Ni(2)-N(9)  | 90.10(18)  |
| C(71)-C(72)     | 1.403(8)   | N(7)-Ni(2)-N(6)  | 90.18(18)  |
| C(71)-C(97)     | 1.493(8)   | N(7)-Ni(2)-N(9)  | 177.17(18) |
| C(72)-C(73)     | 1.446(8)   | N(8)-Ni(2)-N(6)  | 176.89(19) |
| C(73)-C(74)     | 1.347(8)   | N(8)-Ni(2)-N(7)  | 89.71(18)  |
| C(76)-C(77)     | 1.369(8)   | N(8)-Ni(2)-N(9)  | 90.15(18)  |
| C(76)-C(111)    | 1.504(7)   | C(67)-N(1)-Ni(1) | 126.5(4)   |
| C(77)-C(78)     | 1.438(8)   | C(70)-N(1)-Ni(1) | 128.1(4)   |
| C(78)-C(79)     | 1.345(8)   | C(70)-N(1)-C(67) | 105.1(5)   |
| C(79)-C(80)     | 1.437(7)   | C(72)-N(2)-Ni(1) | 127.8(4)   |
| C(80)-C(81)     | 1.385(8)   | C(77)-N(3)-Ni(1) | 128.6(4)   |
| C(81)-C(82)     | 1.380(7)   | C(80)-N(3)-Ni(1) | 126.9(4)   |
| C(83)-C(84)     | 1.394(7)   | C(80)-N(3)-C(77) | 104.5(4)   |
| C(83)-C(88)     | 1.410(8)   | C(65)-N(4)-Ni(1) | 125.3(3)   |
| C(84)-C(85)     | 1.401(8)   | C(82)-N(4)-Ni(1) | 127.4(4)   |
| C(85)-C(86)     | 1.404(7)   | C(82)-N(4)-C(65) | 106.9(5)   |
| C(86)-C(87)     | 1.372(7)   | C(5)-N(6)-Ni(2)  | 128.6(4)   |
| C(87)-C(88)     | 1.420(7)   | C(5)-N(6)-C(8)   | 103.8(4)   |
| C(97)-C(98)     | 1.394(8)   | C(8)-N(6)-Ni(2)  | 127.1(4)   |
| C(97)-C(102)    | 1.391(8)   | C(10)-N(7)-Ni(2) | 127.2(4)   |
| C(98)-C(99)     | 1.399(9)   | C(13)-N(7)-Ni(2) | 126.6(3)   |
| C(99)-C(100)    | 1.388(9)   | C(13)-N(7)-C(10) | 106.1(4)   |
| C(100)-C(101)   | 1.395(8)   | C(15)-N(8)-Ni(2) | 128.7(3)   |
| C(101)-C(102)   | 1.377(8)   | C(15)-N(8)-C(18) | 104.7(4)   |
| C(111)-C(112)   | 1.394(7)   | C(18)-N(8)-Ni(2) | 126.6(4)   |
| C(111)-C(116)   | 1.398(7)   | C(3)-N(9)-Ni(2)  | 126.2(3)   |
| C(112)-C(113)   | 1.405(8)   | C(3)-N(9)-C(20)  | 103.9(4)   |
| C(113)-C(114)   | 1.396(8)   | C(20)-N(9)-Ni(2) | 129.5(4)   |
| C(114)-C(115)   | 1.393(7)   | C(2)-C(1)-C(20)  | 106.6(5)   |
| C(115)-C(116)   | 1.379(8)   | C(1)-C(2)-C(3)   | 105.5(5)   |
| N(1)-Ni(1)-N(2) | 89.28(19)  | C(1)-C(2)-C(63)  | 138.2(5)   |
| N(1)-Ni(1)-N(3) | 173.12(19) | C(63)-C(2)-C(3)  | 116.2(4)   |
| N(1)-Ni(1)-N(4) | 90.88(19)  | N(9)-C(3)-C(2)   | 111.2(4)   |
| N(2)-Ni(1)-N(4) | 173.17(18) | C(4)-C(3)-N(9)   | 126.2(5)   |
| N(3)-Ni(1)-N(2) | 90.19(19)  | C(4)-C(3)-C(2)   | 122.2(5)   |
| N(3)-Ni(1)-N(4) | 90.47(19)  | N(5)-C(4)-C(5)   | 118.1(5)   |

|                   |          |                   |          |
|-------------------|----------|-------------------|----------|
| C(3)-C(4)-N(5)    | 118.8(5) | C(21)-C(22)-C(23) | 120.3(5) |
| C(3)-C(4)-C(5)    | 122.9(5) | C(23)-C(22)-C(19) | 120.5(5) |
| N(6)-C(5)-C(4)    | 123.6(4) | C(24)-C(23)-C(22) | 120.2(5) |
| N(6)-C(5)-C(6)    | 111.7(5) | C(25)-C(24)-C(23) | 117.8(5) |
| C(4)-C(5)-C(6)    | 124.8(5) | C(24)-C(25)-C(26) | 123.4(5) |
| C(7)-C(6)-C(5)    | 107.0(5) | C(25)-C(26)-C(21) | 117.8(5) |
| C(6)-C(7)-C(8)    | 107.5(5) | C(36)-C(35)-C(40) | 121.6(5) |
| N(6)-C(8)-C(7)    | 109.9(5) | C(35)-C(36)-C(14) | 121.7(5) |
| C(9)-C(8)-N(6)    | 124.2(5) | C(35)-C(36)-C(37) | 118.7(5) |
| C(9)-C(8)-C(7)    | 125.7(5) | C(37)-C(36)-C(14) | 119.6(5) |
| C(8)-C(9)-C(49)   | 117.5(5) | C(38)-C(37)-C(36) | 120.8(5) |
| C(10)-C(9)-C(8)   | 122.9(5) | C(39)-C(38)-C(37) | 118.1(5) |
| C(10)-C(9)-C(49)  | 119.5(5) | C(40)-C(39)-C(38) | 123.1(6) |
| N(7)-C(10)-C(11)  | 109.3(4) | C(39)-C(40)-C(35) | 117.7(6) |
| C(9)-C(10)-N(7)   | 126.2(5) | C(50)-C(49)-C(9)  | 121.0(5) |
| C(9)-C(10)-C(11)  | 124.4(5) | C(50)-C(49)-C(54) | 119.9(5) |
| N(7)-C(13)-C(12)  | 109.2(4) | C(54)-C(49)-C(9)  | 119.0(5) |
| N(7)-C(13)-C(14)  | 127.2(5) | C(49)-C(50)-C(51) | 120.6(5) |
| C(14)-C(13)-C(12) | 123.0(5) | C(52)-C(51)-C(50) | 117.9(5) |
| C(13)-C(14)-C(36) | 119.0(5) | C(51)-C(52)-C(53) | 123.4(5) |
| C(15)-C(14)-C(13) | 120.7(5) | C(52)-C(53)-C(54) | 117.9(6) |
| C(15)-C(14)-C(36) | 120.2(5) | C(49)-C(54)-C(53) | 120.4(5) |
| N(8)-C(15)-C(16)  | 110.3(4) | C(2)-C(63)-C(82)  | 135.9(5) |
| C(14)-C(15)-N(8)  | 124.9(5) | C(64)-C(63)-C(2)  | 118.9(5) |
| C(14)-C(15)-C(16) | 124.8(5) | C(64)-C(63)-C(82) | 105.3(5) |
| C(17)-C(16)-C(15) | 107.5(5) | N(5)-C(64)-C(65)  | 128.3(5) |
| C(16)-C(17)-C(18) | 107.2(5) | C(63)-C(64)-N(5)  | 122.7(5) |
| N(8)-C(18)-C(17)  | 110.1(5) | C(63)-C(64)-C(65) | 108.9(5) |
| C(19)-C(18)-N(8)  | 126.0(5) | N(4)-C(65)-C(64)  | 107.8(4) |
| C(19)-C(18)-C(17) | 123.3(5) | C(66)-C(65)-N(4)  | 124.9(5) |
| C(18)-C(19)-C(20) | 123.4(5) | C(66)-C(65)-C(64) | 126.0(5) |
| C(18)-C(19)-C(22) | 118.7(5) | C(65)-C(66)-C(67) | 122.6(5) |
| C(20)-C(19)-C(22) | 117.9(5) | C(65)-C(66)-C(84) | 120.2(5) |
| N(9)-C(20)-C(1)   | 112.6(5) | C(67)-C(66)-C(84) | 117.0(5) |
| N(9)-C(20)-C(19)  | 122.4(5) | N(1)-C(67)-C(68)  | 110.3(5) |
| C(19)-C(20)-C(1)  | 124.9(5) | C(66)-C(67)-N(1)  | 125.7(5) |
| C(22)-C(21)-C(26) | 120.5(5) | C(66)-C(67)-C(68) | 124.0(6) |
| C(21)-C(22)-C(19) | 119.3(5) | C(69)-C(68)-C(67) | 106.3(5) |

|                    |          |                      |          |
|--------------------|----------|----------------------|----------|
| C(68)-C(69)-C(70)  | 107.7(5) | N(4)-C(82)-C(63)     | 110.7(5) |
| N(1)-C(70)-C(69)   | 110.3(5) | N(4)-C(82)-C(81)     | 125.1(5) |
| N(1)-C(70)-C(71)   | 125.8(5) | C(81)-C(82)-C(63)    | 124.2(5) |
| C(71)-C(70)-C(69)  | 123.3(5) | C(84)-C(83)-C(88)    | 120.7(5) |
| C(70)-C(71)-C(72)  | 119.9(5) | C(83)-C(84)-C(66)    | 121.6(5) |
| C(70)-C(71)-C(97)  | 120.3(5) | C(83)-C(84)-C(85)    | 120.4(5) |
| C(72)-C(71)-C(97)  | 119.7(5) | C(85)-C(84)-C(66)    | 118.0(5) |
| N(2)-C(72)-C(71)   | 126.4(5) | C(84)-C(85)-C(86)    | 120.1(5) |
| N(2)-C(72)-C(73)   | 110.0(5) | C(87)-C(86)-C(85)    | 118.8(5) |
| C(71)-C(72)-C(73)  | 123.6(5) | C(86)-C(87)-C(88)    | 123.1(5) |
| C(74)-C(73)-C(72)  | 106.3(5) | C(83)-C(88)-C(87)    | 117.0(5) |
| C(73)-C(74)-C(75)  | 108.5(5) | C(98)-C(97)-C(71)    | 119.0(5) |
| N(2)-C(75)-C(74)   | 109.9(5) | C(102)-C(97)-C(71)   | 122.4(5) |
| C(76)-C(75)-N(2)   | 124.4(5) | C(102)-C(97)-C(98)   | 118.6(6) |
| C(76)-C(75)-C(74)  | 125.4(5) | C(97)-C(98)-C(99)    | 121.6(6) |
| C(75)-C(76)-C(111) | 117.5(5) | C(100)-C(99)-C(98)   | 117.2(6) |
| C(77)-C(76)-C(75)  | 124.0(5) | C(99)-C(100)-C(101)  | 122.9(6) |
| C(77)-C(76)-C(111) | 118.3(5) | C(102)-C(101)-C(100) | 117.9(6) |
| N(3)-C(77)-C(78)   | 110.1(5) | C(101)-C(102)-C(97)  | 121.8(5) |
| C(76)-C(77)-N(3)   | 123.8(5) | C(112)-C(111)-C(76)  | 120.5(5) |
| C(76)-C(77)-C(78)  | 126.0(5) | C(112)-C(111)-C(116) | 118.4(5) |
| C(79)-C(78)-C(77)  | 107.2(5) | C(116)-C(111)-C(76)  | 121.1(5) |
| C(78)-C(79)-C(80)  | 106.7(5) | C(111)-C(112)-C(113) | 121.0(5) |
| N(3)-C(80)-C(79)   | 111.4(5) | C(114)-C(113)-C(112) | 118.5(5) |
| N(3)-C(80)-C(81)   | 126.1(5) | C(115)-C(114)-C(113) | 121.5(5) |
| C(81)-C(80)-C(79)  | 122.1(5) | C(116)-C(115)-C(114) | 118.6(5) |
| C(82)-C(81)-C(80)  | 122.5(5) | C(115)-C(116)-C(111) | 122.1(5) |

a)

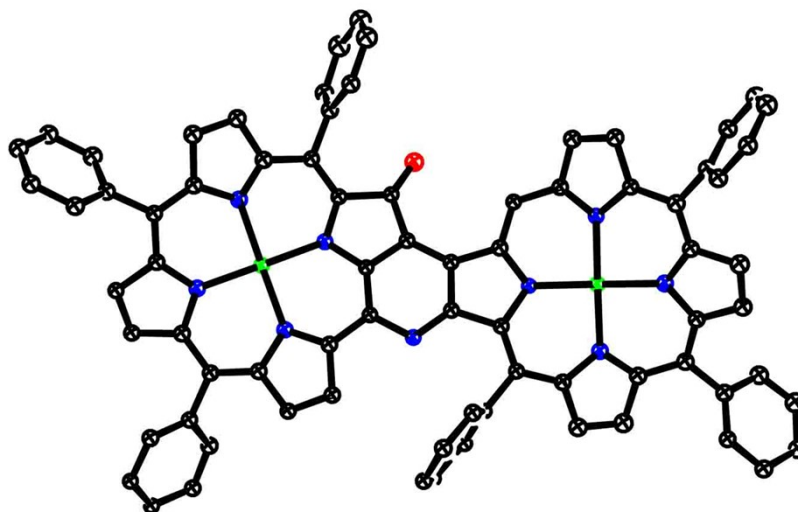

b)

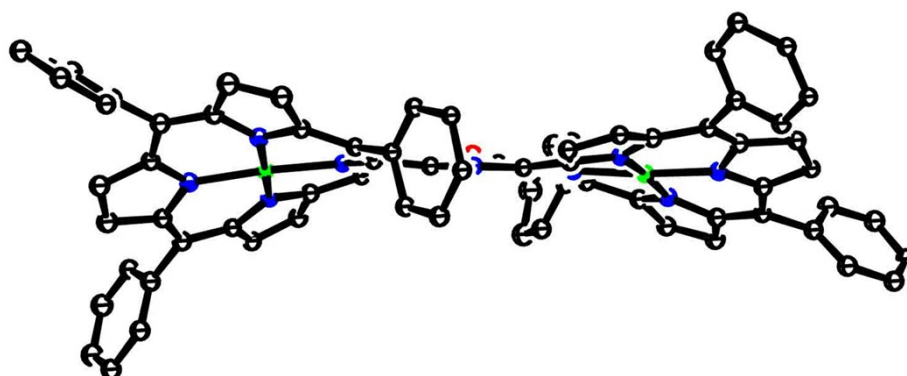

**Figure S35.** X-ray crystal structure of **10**: a) top view, b) side view. The thermal ellipsoids are 50% probability level. H atoms, alkyl groups and solvent molecules are omitted for clarity

**Table S5.** Crystal data and structure refinement for **10**

|                      |                                                                    |                                |
|----------------------|--------------------------------------------------------------------|--------------------------------|
| Identification code  | exp_2672_sq                                                        |                                |
| Empirical formula    | C <sub>124</sub> H <sub>139</sub> N <sub>9</sub> Ni <sub>2</sub> O |                                |
| Formula weight       | 1885.98                                                            |                                |
| Temperature          | 100.01(10) K                                                       |                                |
| Wavelength           | 1.54184 Å                                                          |                                |
| Crystal system       | Triclinic                                                          |                                |
| Space group          | P-1                                                                |                                |
| Unit cell dimensions | a = 13.6749(3) Å                                                   | $\alpha = 80.6240(10)^\circ$ . |
|                      | b = 28.8378(6) Å                                                   | $\beta = 80.4790(10)^\circ$ .  |
|                      | c = 35.2694(5) Å                                                   | $\gamma = 85.127(2)^\circ$ .   |
| Volume               | 13509.7(5) Å <sup>3</sup>                                          |                                |



|                                   |                                             |
|-----------------------------------|---------------------------------------------|
| Z                                 | 4                                           |
| Density (calculated)              | 0.929 Mg/m <sup>3</sup>                     |
| Absorption coefficient            | 0.670 mm <sup>-1</sup>                      |
| F(000)                            | 4040                                        |
| Crystal size                      | 0.1 x 0.1 x 0.05 mm <sup>3</sup>            |
| Theta range for data collection   | 2.570 to 66.600°.                           |
| Index ranges                      | -16<=h<=16, -32<=k<=34, -31<=l<=41          |
| Reflections collected             | 86471                                       |
| Independent reflections           | 47486 [R(int) = 0.0770]                     |
| Completeness to theta = 66.600°   | 99.4 %                                      |
| Absorption correction             | Semi-empirical from equivalents             |
| Max. and min. transmission        | 1.00000 and 0.58358                         |
| Refinement method                 | Full-matrix least-squares on F <sup>2</sup> |
| Data / restraints / parameters    | 47486 / 1192 / 2641                         |
| Goodness-of-fit on F <sup>2</sup> | 0.993                                       |
| Final R indices [I>2sigma(I)]     | R1 = 0.0895, wR2 = 0.2400                   |
| R indices (all data)              | R1 = 0.1427, wR2 = 0.2874                   |
| Extinction coefficient            | n/a                                         |
| Largest diff. peak and hole       | 0.744 and -0.500 e.Å <sup>-3</sup>          |

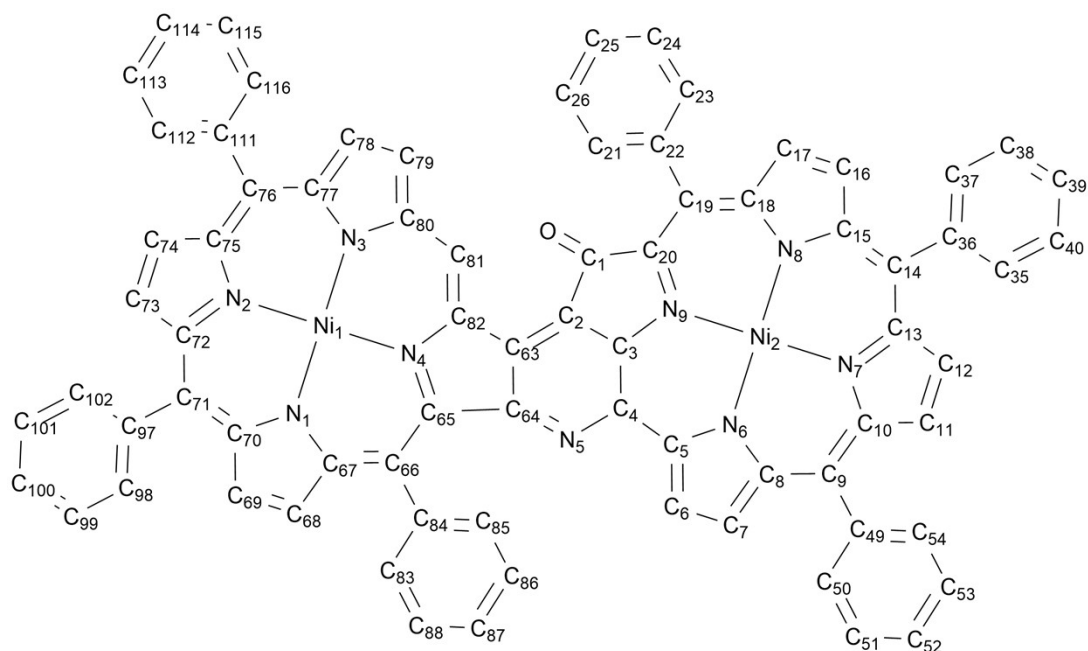

**Table S6.** bond lengths (Å) and angles (°) for **10**

|             |           |             |           |
|-------------|-----------|-------------|-----------|
| Ni(1)-N(4)  | 1.932(11) | C(84)-C(83) | 1.41(2)   |
| Ni(1)-N(1)  | 1.948(11) | C(85)-C(86) | 1.410(18) |
| Ni(1)-N(2)  | 1.920(11) | C(12)-C(11) | 1.352(19) |
| Ni(1)-N(3)  | 1.954(11) | C(12)-C(13) | 1.439(18) |
| Ni(2)-N(6)  | 1.909(11) | C(6)-C(5)   | 1.438(18) |
| Ni(2)-N(9)  | 1.925(10) | C(6)-C(7)   | 1.339(18) |
| Ni(2)-N(8)  | 1.932(11) | C(82)-C(81) | 1.372(18) |
| Ni(2)-N(7)  | 1.908(10) | C(53)-C(54) | 1.409(18) |
| O(1)-C(1)   | 1.218(16) | C(53)-C(52) | 1.38(2)   |
| N(5)-C(4)   | 1.401(16) | C(64)-C(65) | 1.473(17) |
| N(5)-C(64)  | 1.349(16) | C(11)-C(10) | 1.418(18) |
| N(6)-C(67)  | 1.365(16) | C(54)-C(49) | 1.377(19) |
| N(6)-C(70)  | 1.375(18) | C(67)-C(66) | 1.403(18) |
| N(4)-C(3)   | 1.373(16) | C(67)-C(68) | 1.465(19) |
| N(4)-C(20)  | 1.367(17) | C(65)-C(66) | 1.354(18) |
| N(9)-C(82)  | 1.385(16) | C(86)-C(87) | 1.36(2)   |
| N(9)-C(65)  | 1.415(16) | C(49)-C(9)  | 1.515(17) |
| Ni(1)-C(5)  | 1.354(17) | C(70)-C(71) | 1.369(19) |
| Ni(1)-C(8)  | 1.386(16) | C(70)-C(69) | 1.486(18) |
| N(2)-C(10)  | 1.429(16) | C(80)-C(81) | 1.377(18) |
| N(2)-C(13)  | 1.357(17) | C(80)-C(79) | 1.465(17) |
| N(3)-C(15)  | 1.403(17) | C(88)-C(83) | 1.369(19) |
| N(3)-C(18)  | 1.364(17) | C(88)-C(87) | 1.447(18) |
| N(8)-C(80)  | 1.376(17) | C(36)-C(35) | 1.39(2)   |
| N(8)-C(77)  | 1.349(17) | C(36)-C(14) | 1.495(18) |
| N(7)-C(72)  | 1.380(18) | C(52)-C(51) | 1.43(2)   |
| N(7)-C(75)  | 1.406(17) | C(22)-C(19) | 1.533(18) |
| C(63)-C(2)  | 1.400(18) | C(22)-C(21) | 1.40(2)   |
| C(63)-C(82) | 1.428(17) | C(22)-C(23) | 1.36(2)   |
| C(63)-C(64) | 1.396(18) | C(17)-C(16) | 1.38(2)   |
| C(4)-C(3)   | 1.399(18) | C(17)-C(18) | 1.417(19) |
| C(4)-C(5)   | 1.402(17) | C(10)-C(9)  | 1.377(19) |
| C(2)-C(1)   | 1.464(18) | C(15)-C(16) | 1.456(19) |
| C(2)-C(3)   | 1.400(17) | C(15)-C(14) | 1.350(19) |
| C(1)-C(20)  | 1.510(18) | C(20)-C(19) | 1.333(19) |
| C(84)-C(85) | 1.374(19) | C(7)-C(8)   | 1.401(18) |
| C(84)-C(66) | 1.495(17) | C(18)-C(19) | 1.385(19) |

|                 |           |                   |           |
|-----------------|-----------|-------------------|-----------|
| C(102)-C(97)    | 1.41(2)   | N(6)-Ni(2)-N(9)   | 90.6(4)   |
| C(102)-C(101)   | 1.36(2)   | N(6)-Ni(2)-N(8)   | 176.4(5)  |
| C(76)-C(111)    | 1.516(19) | N(8)-Ni(2)-N(9)   | 90.7(4)   |
| C(76)-C(77)     | 1.420(18) | N(7)-Ni(2)-N(6)   | 89.5(5)   |
| C(76)-C(75)     | 1.36(2)   | N(7)-Ni(2)-N(9)   | 175.1(5)  |
| C(78)-C(79)     | 1.35(2)   | N(7)-Ni(2)-N(8)   | 89.4(5)   |
| C(78)-C(77)     | 1.457(19) | C(64)-N(5)-C(4)   | 115.0(10) |
| C(71)-C(72)     | 1.40(2)   | C(67)-N(6)-Ni(2)  | 127.0(9)  |
| C(71)-C(97)     | 1.513(19) | C(67)-N(6)-C(70)  | 106.6(11) |
| C(21)-C(26)     | 1.44(2)   | C(70)-N(6)-Ni(2)  | 126.3(9)  |
| C(112)-C(113)   | 1.43(2)   | C(3)-N(4)-Ni(1)   | 126.3(9)  |
| C(112)-C(111)   | 1.41(2)   | C(20)-N(4)-Ni(1)  | 127.5(9)  |
| C(72)-C(73)     | 1.448(17) | C(20)-N(4)-C(3)   | 106.1(10) |
| C(13)-C(14)     | 1.409(18) | C(82)-N(9)-Ni(2)  | 127.7(8)  |
| C(8)-C(9)       | 1.406(18) | C(65)-N(9)-Ni(2)  | 124.6(8)  |
| C(113)-C(114)   | 1.41(2)   | C(65)-N(9)-C(82)  | 107.6(10) |
| C(97)-C(98)     | 1.37(2)   | C(5)-N(1)-Ni(1)   | 126.6(9)  |
| C(69)-C(68)     | 1.37(2)   | C(5)-N(1)-C(8)    | 105.1(11) |
| C(35)-C(40)     | 1.39(2)   | C(8)-N(1)-Ni(1)   | 128.2(9)  |
| C(40)-C(39)     | 1.37(2)   | C(10)-N(2)-Ni(1)  | 125.9(9)  |
| C(100)-C(99)    | 1.41(2)   | C(13)-N(2)-Ni(1)  | 128.4(9)  |
| C(100)-C(101)   | 1.41(2)   | C(13)-N(2)-C(10)  | 104.7(10) |
| C(111)-C(116)   | 1.41(2)   | C(15)-N(3)-Ni(1)  | 125.3(9)  |
| C(23)-C(24)     | 1.50(2)   | C(18)-N(3)-Ni(1)  | 128.2(9)  |
| C(75)-C(74)     | 1.407(19) | C(18)-N(3)-C(15)  | 106.5(11) |
| C(39)-C(38)     | 1.40(2)   | C(80)-N(8)-Ni(2)  | 124.5(9)  |
| C(116)-C(115)   | 1.35(2)   | C(80)-N(8)-C(77)  | 106.6(11) |
| C(99)-C(98)     | 1.448(19) | C(77)-N(8)-Ni(2)  | 128.9(9)  |
| C(115)-C(114)   | 1.43(3)   | C(72)-N(7)-Ni(2)  | 128.1(9)  |
| C(73)-C(74)     | 1.36(2)   | C(75)-N(7)-Ni(2)  | 126.4(9)  |
| C(26)-C(25)     | 1.41(3)   | C(75)-N(7)-C(72)  | 105.3(10) |
| C(24)-C(25)     | 1.33(3)   | C(2)-C(63)-C(82)  | 135.4(12) |
| N(4)-Ni(1)-N(1) | 90.7(5)   | C(2)-C(63)-C(64)  | 117.4(11) |
| N(4)-Ni(1)-N(2) | 174.9(5)  | C(82)-C(63)-C(64) | 107.0(11) |
| N(4)-Ni(1)-N(3) | 89.1(5)   | N(5)-C(4)-C(3)    | 122.3(11) |
| N(1)-Ni(1)-N(3) | 175.6(5)  | N(5)-C(4)-C(5)    | 115.7(11) |
| N(2)-Ni(1)-N(1) | 90.2(5)   | C(3)-C(4)-C(5)    | 121.6(11) |
| N(2)-Ni(1)-N(3) | 90.4(5)   | C(63)-C(2)-C(1)   | 134.8(12) |

|                   |           |                     |           |
|-------------------|-----------|---------------------|-----------|
| C(63)-C(2)-C(3)   | 118.9(12) | N(8)-C(80)-C(79)    | 108.7(11) |
| C(3)-C(2)-C(1)    | 106.2(11) | C(81)-C(80)-C(79)   | 123.0(12) |
| O(1)-C(1)-C(2)    | 129.9(12) | C(83)-C(88)-C(87)   | 116.9(13) |
| O(1)-C(1)-C(20)   | 127.6(12) | C(35)-C(36)-C(14)   | 122.5(13) |
| C(2)-C(1)-C(20)   | 102.5(11) | C(80)-C(81)-C(82)   | 122.6(12) |
| C(85)-C(84)-C(66) | 124.4(13) | C(53)-C(52)-C(51)   | 121.1(12) |
| C(83)-C(84)-C(85) | 119.9(12) | N(1)-C(5)-C(4)      | 125.2(12) |
| C(83)-C(84)-C(66) | 115.6(12) | N(1)-C(5)-C(6)      | 110.6(11) |
| C(84)-C(85)-C(86) | 120.6(13) | C(4)-C(5)-C(6)      | 123.4(12) |
| C(11)-C(12)-C(13) | 106.3(11) | C(21)-C(22)-C(19)   | 116.7(13) |
| N(4)-C(3)-C(4)    | 126.2(11) | C(23)-C(22)-C(19)   | 118.9(13) |
| N(4)-C(3)-C(2)    | 113.8(11) | C(23)-C(22)-C(21)   | 124.4(14) |
| C(2)-C(3)-C(4)    | 119.8(12) | C(84)-C(83)-C(88)   | 121.5(13) |
| C(7)-C(6)-C(5)    | 105.9(12) | C(16)-C(17)-C(18)   | 108.3(12) |
| N(9)-C(82)-C(63)  | 110.4(11) | N(2)-C(10)-C(11)    | 108.9(12) |
| C(81)-C(82)-N(9)  | 123.9(11) | N(2)-C(10)-C(9)     | 124.5(11) |
| C(81)-C(82)-C(63) | 125.2(12) | C(9)-C(10)-C(11)    | 125.9(12) |
| C(52)-C(53)-C(54) | 118.9(12) | N(3)-C(15)-C(16)    | 108.6(12) |
| N(5)-C(64)-C(63)  | 126.4(12) | C(14)-C(15)-N(3)    | 125.7(12) |
| N(5)-C(64)-C(65)  | 125.9(12) | C(14)-C(15)-C(16)   | 125.5(12) |
| C(63)-C(64)-C(65) | 107.3(11) | N(4)-C(20)-C(1)     | 110.6(11) |
| C(12)-C(11)-C(10) | 108.5(12) | C(19)-C(20)-N(4)    | 125.9(12) |
| C(49)-C(54)-C(53) | 119.9(13) | C(19)-C(20)-C(1)    | 123.1(12) |
| N(6)-C(67)-C(66)  | 125.9(12) | C(86)-C(87)-C(88)   | 122.3(13) |
| N(6)-C(67)-C(68)  | 110.9(12) | C(17)-C(16)-C(15)   | 105.6(13) |
| C(66)-C(67)-C(68) | 123.1(12) | C(6)-C(7)-C(8)      | 108.3(11) |
| N(9)-C(65)-C(64)  | 107.0(11) | N(3)-C(18)-C(17)    | 110.2(12) |
| C(66)-C(65)-N(9)  | 126.0(11) | N(3)-C(18)-C(19)    | 123.8(12) |
| C(66)-C(65)-C(64) | 126.6(11) | C(19)-C(18)-C(17)   | 125.5(12) |
| C(67)-C(66)-C(84) | 119.9(12) | C(97)-C(102)-C(101) | 122.4(14) |
| C(65)-C(66)-C(84) | 120.1(12) | C(77)-C(76)-C(111)  | 117.2(13) |
| C(65)-C(66)-C(67) | 119.9(12) | C(75)-C(76)-C(111)  | 120.8(12) |
| C(87)-C(86)-C(85) | 118.6(12) | C(75)-C(76)-C(77)   | 121.9(13) |
| C(54)-C(49)-C(9)  | 120.1(13) | C(79)-C(78)-C(77)   | 105.2(11) |
| N(6)-C(70)-C(71)  | 126.2(13) | C(20)-C(19)-C(22)   | 122.7(12) |
| N(6)-C(70)-C(69)  | 109.3(11) | C(20)-C(19)-C(18)   | 123.5(13) |
| C(71)-C(70)-C(69) | 123.8(13) | C(18)-C(19)-C(22)   | 113.4(12) |
| N(8)-C(80)-C(81)  | 126.9(12) | C(70)-C(71)-C(72)   | 120.1(13) |

|                      |           |                      |           |
|----------------------|-----------|----------------------|-----------|
| C(70)-C(71)-C(97)    | 122.4(13) | C(116)-C(111)-C(76)  | 121.5(15) |
| C(72)-C(71)-C(97)    | 116.9(12) | C(69)-C(68)-C(67)    | 106.1(12) |
| C(78)-C(79)-C(80)    | 107.7(12) | N(8)-C(77)-C(76)     | 123.9(13) |
| C(26)-C(21)-C(22)    | 118.2(16) | N(8)-C(77)-C(78)     | 111.5(11) |
| C(111)-C(112)-C(113) | 119.5(14) | C(76)-C(77)-C(78)    | 124.6(12) |
| N(7)-C(72)-C(71)     | 124.7(11) | C(22)-C(23)-C(24)    | 117.7(16) |
| N(7)-C(72)-C(73)     | 109.9(12) | N(7)-C(75)-C(74)     | 110.0(12) |
| C(71)-C(72)-C(73)    | 125.1(13) | C(76)-C(75)-N(7)     | 124.8(12) |
| N(2)-C(13)-C(12)     | 111.5(11) | C(76)-C(75)-C(74)    | 124.2(13) |
| N(2)-C(13)-C(14)     | 124.8(12) | C(38)-C(39)-C(40)    | 122.8(14) |
| C(14)-C(13)-C(12)    | 123.5(12) | C(115)-C(116)-C(111) | 122.1(17) |
| NI(1)-C(8)-C(7)      | 110.0(11) | C(100)-C(99)-C(98)   | 117.4(14) |
| C(9)-C(8)-NI(1)      | 124.1(12) | C(116)-C(115)-C(114) | 118.1(15) |
| C(9)-C(8)-C(7)       | 125.8(12) | C(97)-C(98)-C(99)    | 119.1(14) |
| C(112)-C(113)-C(114) | 117.2(16) | C(74)-C(73)-C(72)    | 106.5(12) |
| C(102)-C(97)-C(71)   | 119.5(13) | C(115)-C(114)-C(113) | 122.6(15) |
| C(102)-C(97)-C(98)   | 120.6(14) | C(73)-C(74)-C(75)    | 108.2(12) |
| C(98)-C(97)-C(71)    | 119.8(13) | C(21)-C(26)-C(25)    | 116.4(17) |
| C(68)-C(69)-C(70)    | 106.2(12) | C(25)-C(24)-C(23)    | 117.0(18) |
| C(10)-C(9)-C(49)     | 120.1(11) | C(102)-C(101)-C(100) | 117.5(13) |
| C(8)-C(9)-C(49)      | 117.2(12) | C(24)-C(25)-C(26)    | 126.3(16) |
| C(8)-C(9)-C(10)      | 122.7(12) |                      |           |
| C(36)-C(35)-C(40)    | 119.9(15) |                      |           |
| C(15)-C(14)-C(36)    | 119.3(12) |                      |           |
| C(15)-C(14)-C(13)    | 122.2(12) |                      |           |
| C(13)-C(14)-C(36)    | 117.7(11) |                      |           |
| C(39)-C(40)-C(35)    | 119.5(15) |                      |           |
| C(99)-C(100)-C(101)  | 122.4(14) |                      |           |
| C(112)-C(111)-C(76)  | 118.0(13) |                      |           |
| C(112)-C(111)-C(116) | 120.3(14) |                      |           |

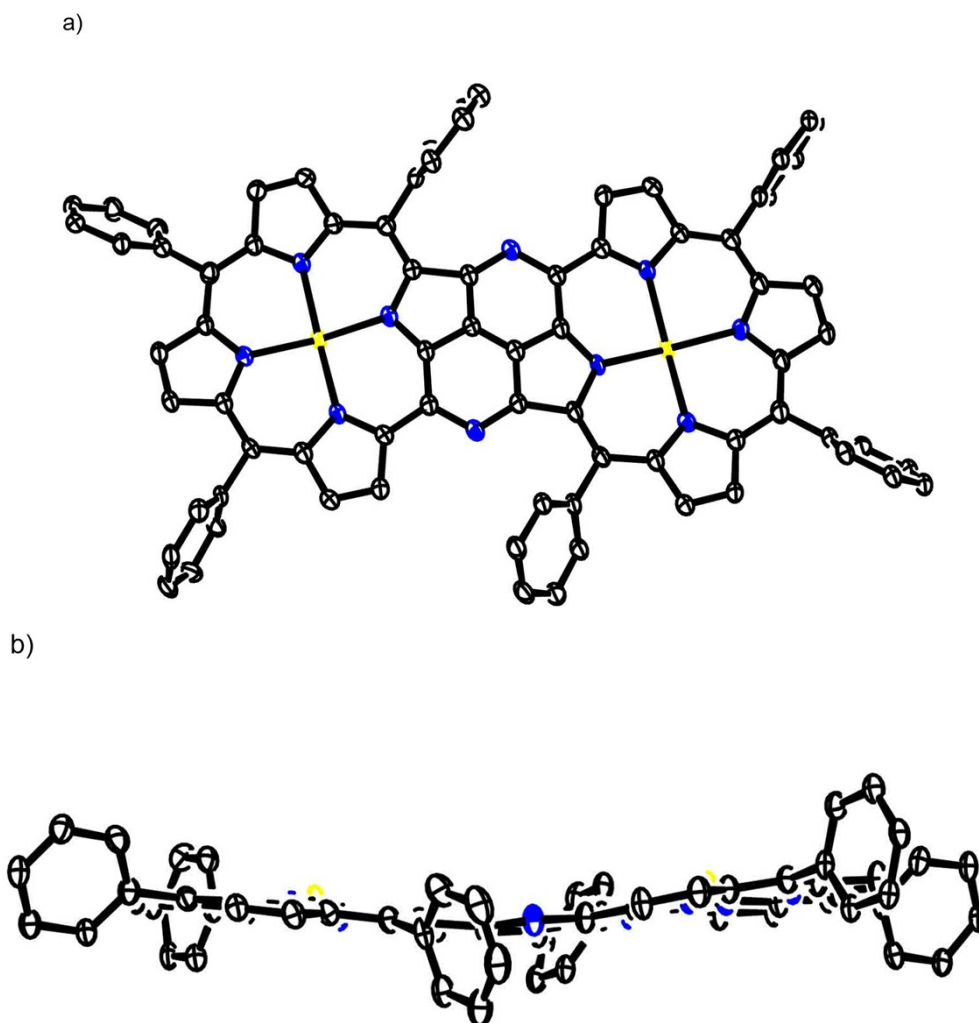

**Figure S36.** X-ray crystal structure of **13**: a) top view, b) side view. The thermal ellipsoids are 50% probability level. H atoms, alkyl groups and solvent molecules are omitted for clarity

**Table S7.** Crystal data and structure refinement for **13**

|                      |                            |                              |
|----------------------|----------------------------|------------------------------|
| Identification code  | exp_2084_sq                |                              |
| Empirical formula    | $C_{124}H_{138}N_{10}Zn_2$ |                              |
| Formula weight       | 1894.96                    |                              |
| Temperature          | 100.01(10) K               |                              |
| Wavelength           | 1.54184 Å                  |                              |
| Crystal system       | Triclinic                  |                              |
| Space group          | P-1                        |                              |
| Unit cell dimensions | $a = 18.3265(6)$ Å         | $\alpha = 75.814(3)^\circ$ . |
|                      | $b = 19.8075(7)$ Å         | $\beta = 86.784(3)^\circ$ .  |
|                      | $c = 20.8248(7)$ Å         | $\gamma = 70.175(3)^\circ$ . |
| Volume               | $6891.5(4)$ Å <sup>3</sup> |                              |

|                                   |                                             |
|-----------------------------------|---------------------------------------------|
| Z                                 | 2                                           |
| Density (calculated)              | 0.991 Mg/m <sup>3</sup>                     |
| Absorption coefficient            | 0.778 mm <sup>-1</sup>                      |
| F(000)                            | 2192                                        |
| Crystal size                      | 0.2 x 0.2 x 0.1 mm <sup>3</sup>             |
| Theta range for data collection   | 2.189 to 66.596°.                           |
| Index ranges                      | -19<=h<=21, -19<=k<=23, -24<=l<=24          |
| Reflections collected             | 47079                                       |
| Independent reflections           | 24343 [R(int) = 0.0458]                     |
| Completeness to theta = 66.596°   | 100.0 %                                     |
| Absorption correction             | Semi-empirical from equivalents             |
| Max. and min. transmission        | 1.00000 and 0.77866                         |
| Refinement method                 | Full-matrix least-squares on F <sup>2</sup> |
| Data / restraints / parameters    | 24343 / 0 / 1369                            |
| Goodness-of-fit on F <sup>2</sup> | 1.023                                       |
| Final R indices [I>2sigma(I)]     | R1 = 0.0679, wR2 = 0.1800                   |
| R indices (all data)              | R1 = 0.0915, wR2 = 0.1974                   |
| Extinction coefficient            | n/a                                         |
| Largest diff. peak and hole       | 1.014 and -0.640 e.Å <sup>-3</sup>          |

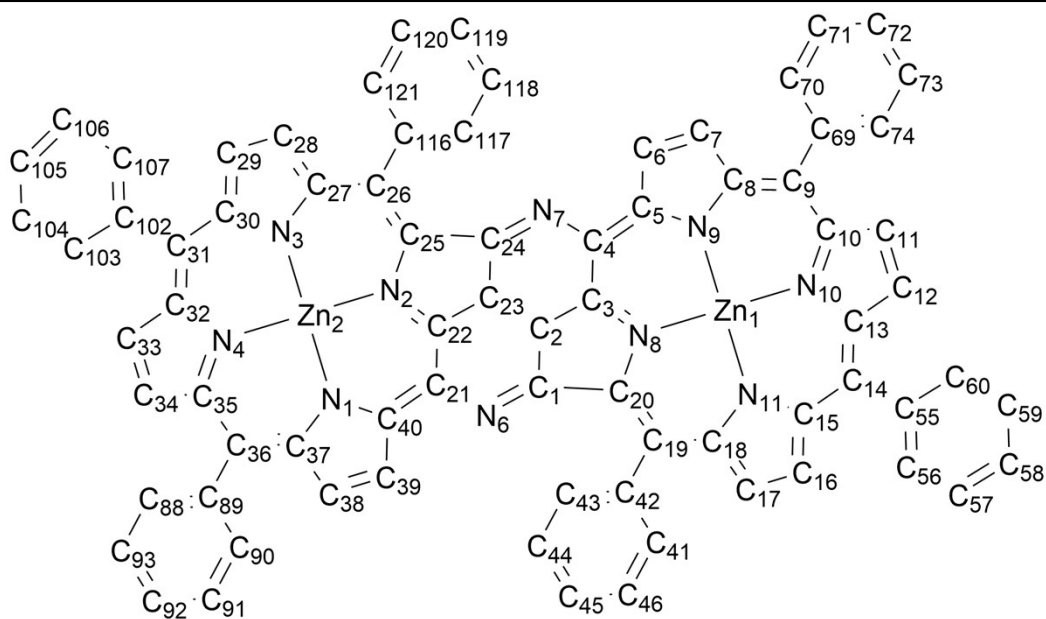

**Table S8.** bond lengths (Å) and angles (°) for **13**

|               |          |               |          |
|---------------|----------|---------------|----------|
| Zn(1)-N(10)   | 2.025(3) | C(59)-C(60)   | 1.404(5) |
| Zn(1)-N(11)   | 2.094(3) | C(107)-C(102) | 1.390(5) |
| Zn(1)-N(8)    | 2.028(3) | C(13)-C(12)   | 1.434(5) |
| Zn(1)-N(9)    | 2.154(3) | C(13)-C(14)   | 1.419(5) |
| Zn(2)-N(2)    | 2.024(3) | C(18)-C(19)   | 1.419(5) |
| Zn(2)-N(4)    | 2.024(3) | C(18)-C(17)   | 1.440(5) |
| Zn(2)-N(1)    | 2.157(3) | C(57)-C(56)   | 1.395(5) |
| Zn(2)-N(3)    | 2.103(3) | C(12)-C(11)   | 1.350(5) |
| N(10)-C(10)   | 1.374(4) | C(16)-C(15)   | 1.445(5) |
| N(10)-C(13)   | 1.374(4) | C(16)-C(17)   | 1.350(5) |
| N(2)-C(22)    | 1.379(5) | C(22)-C(21)   | 1.438(5) |
| N(2)-C(25)    | 1.410(4) | C(22)-C(23)   | 1.370(5) |
| N(11)-C(18)   | 1.360(4) | C(32)-C(33)   | 1.437(5) |
| N(11)-C(15)   | 1.376(4) | C(32)-C(31)   | 1.411(5) |
| N(4)-C(32)    | 1.369(5) | C(69)-C(9)    | 1.496(4) |
| N(4)-C(35)    | 1.383(4) | C(69)-C(70)   | 1.385(5) |
| N(1)-C(37)    | 1.394(4) | C(69)-C(74)   | 1.380(5) |
| N(1)-C(40)    | 1.357(5) | C(19)-C(42)   | 1.502(5) |
| N(8)-C(3)     | 1.372(5) | C(19)-C(20)   | 1.388(5) |
| N(8)-C(20)    | 1.392(4) | C(15)-C(14)   | 1.403(5) |
| N(9)-C(8)     | 1.384(4) | C(89)-C(88)   | 1.392(5) |
| N(9)-C(5)     | 1.365(5) | C(89)-C(36)   | 1.508(4) |
| N(3)-C(30)    | 1.382(5) | C(42)-C(43)   | 1.390(6) |
| N(3)-C(27)    | 1.362(4) | C(42)-C(41)   | 1.382(5) |
| N(6)-C(21)    | 1.393(5) | C(56)-C(55)   | 1.397(5) |
| N(6)-C(1)     | 1.329(5) | C(3)-C(2)     | 1.374(5) |
| N(7)-C(4)     | 1.390(5) | C(3)-C(4)     | 1.427(5) |
| N(7)-C(24)    | 1.341(4) | C(9)-C(8)     | 1.392(5) |
| C(90)-C(89)   | 1.389(5) | C(71)-C(72)   | 1.383(6) |
| C(90)-C(91)   | 1.398(5) | C(71)-C(70)   | 1.404(5) |
| C(106)-C(105) | 1.400(5) | C(21)-C(40)   | 1.429(5) |
| C(106)-C(107) | 1.387(5) | C(55)-C(60)   | 1.373(5) |
| C(58)-C(59)   | 1.387(5) | C(55)-C(14)   | 1.502(5) |
| C(58)-C(57)   | 1.393(5) | C(91)-C(92)   | 1.399(5) |
| C(105)-C(104) | 1.394(5) | C(117)-C(116) | 1.383(5) |
| C(10)-C(11)   | 1.430(5) | C(117)-C(118) | 1.404(5) |
| C(10)-C(9)    | 1.414(5) | C(120)-C(121) | 1.392(5) |



|               |          |                   |            |
|---------------|----------|-------------------|------------|
| C(120)-C(119) | 1.396(6) | N(10)-Zn(1)-N(11) | 90.40(11)  |
| C(72)-C(73)   | 1.395(5) | N(10)-Zn(1)-N(8)  | 159.20(13) |
| C(37)-C(38)   | 1.439(5) | N(10)-Zn(1)-N(9)  | 89.75(11)  |
| C(37)-C(36)   | 1.389(5) | N(11)-Zn(1)-N(9)  | 165.73(12) |
| C(38)-C(39)   | 1.354(5) | N(8)-Zn(1)-N(11)  | 86.43(11)  |
| C(23)-C(2)    | 1.332(5) | N(8)-Zn(1)-N(9)   | 88.38(11)  |
| C(23)-C(24)   | 1.387(5) | N(2)-Zn(2)-N(1)   | 88.99(11)  |
| C(25)-C(26)   | 1.381(5) | N(2)-Zn(2)-N(3)   | 85.35(11)  |
| C(25)-C(24)   | 1.511(5) | N(4)-Zn(2)-N(2)   | 159.44(13) |
| C(28)-C(27)   | 1.437(5) | N(4)-Zn(2)-N(1)   | 89.39(11)  |
| C(28)-C(29)   | 1.354(5) | N(4)-Zn(2)-N(3)   | 90.12(11)  |
| C(30)-C(31)   | 1.400(5) | N(3)-Zn(2)-N(1)   | 162.48(12) |
| C(30)-C(29)   | 1.438(5) | C(10)-N(10)-Zn(1) | 126.4(2)   |
| C(104)-C(103) | 1.390(5) | C(10)-N(10)-C(13) | 106.5(3)   |
| C(26)-C(27)   | 1.437(5) | C(13)-N(10)-Zn(1) | 125.9(2)   |
| C(26)-C(116)  | 1.507(5) | C(22)-N(2)-Zn(2)  | 120.6(2)   |
| C(1)-C(20)    | 1.518(5) | C(22)-N(2)-C(25)  | 108.2(3)   |
| C(1)-C(2)     | 1.399(5) | C(25)-N(2)-Zn(2)  | 130.2(2)   |
| C(92)-C(93)   | 1.397(5) | C(18)-N(11)-Zn(1) | 127.9(2)   |
| C(88)-C(93)   | 1.393(5) | C(18)-N(11)-C(15) | 107.3(3)   |
| C(8)-C(7)     | 1.436(5) | C(15)-N(11)-Zn(1) | 124.7(2)   |
| C(121)-C(116) | 1.392(5) | C(32)-N(4)-Zn(2)  | 126.8(2)   |
| C(40)-C(39)   | 1.438(5) | C(32)-N(4)-C(35)  | 106.7(3)   |
| C(102)-C(103) | 1.380(5) | C(35)-N(4)-Zn(2)  | 126.1(2)   |
| C(102)-C(31)  | 1.499(5) | C(37)-N(1)-Zn(2)  | 123.2(2)   |
| C(33)-C(34)   | 1.348(5) | C(40)-N(1)-Zn(2)  | 129.9(2)   |
| C(36)-C(35)   | 1.419(5) | C(40)-N(1)-C(37)  | 105.8(3)   |
| C(35)-C(34)   | 1.423(5) | C(3)-N(8)-Zn(1)   | 120.2(2)   |
| C(73)-C(74)   | 1.394(5) | C(3)-N(8)-C(20)   | 108.5(3)   |
| C(5)-C(4)     | 1.425(5) | C(20)-N(8)-Zn(1)  | 130.1(2)   |
| C(5)-C(6)     | 1.428(5) | C(8)-N(9)-Zn(1)   | 123.3(2)   |
| C(6)-C(7)     | 1.356(5) | C(5)-N(9)-Zn(1)   | 129.5(2)   |
| C(118)-C(119) | 1.380(6) | C(5)-N(9)-C(8)    | 105.7(3)   |
| C(43)-C(44)   | 1.394(5) | C(30)-N(3)-Zn(2)  | 125.0(2)   |
| C(41)-C(46)   | 1.420(6) | C(27)-N(3)-Zn(2)  | 128.2(2)   |
| C(44)-C(45)   | 1.368(6) | C(27)-N(3)-C(30)  | 106.9(3)   |
| C(46)-C(45)   | 1.374(7) | C(1)-N(6)-C(21)   | 118.3(3)   |
|               |          | C(24)-N(7)-C(4)   | 118.8(3)   |

|                      |          |                      |          |
|----------------------|----------|----------------------|----------|
| C(89)-C(90)-C(91)    | 121.3(3) | C(41)-C(42)-C(43)    | 119.7(4) |
| C(107)-C(106)-C(105) | 118.1(3) | C(57)-C(56)-C(55)    | 120.6(3) |
| C(59)-C(58)-C(57)    | 122.6(3) | C(12)-C(11)-C(10)    | 107.1(3) |
| C(104)-C(105)-C(106) | 121.8(3) | N(8)-C(3)-C(2)       | 107.9(3) |
| N(10)-C(10)-C(11)    | 109.7(3) | N(8)-C(3)-C(4)       | 136.9(3) |
| N(10)-C(10)-C(9)     | 126.2(3) | C(2)-C(3)-C(4)       | 114.8(3) |
| C(9)-C(10)-C(11)     | 124.1(3) | C(10)-C(9)-C(69)     | 117.1(3) |
| C(58)-C(59)-C(60)    | 117.7(3) | C(8)-C(9)-C(10)      | 126.9(3) |
| C(106)-C(107)-C(102) | 121.7(3) | C(8)-C(9)-C(69)      | 116.0(3) |
| N(10)-C(13)-C(12)    | 109.2(3) | C(72)-C(71)-C(70)    | 118.5(3) |
| N(10)-C(13)-C(14)    | 125.5(3) | N(6)-C(21)-C(22)     | 122.9(3) |
| C(14)-C(13)-C(12)    | 125.3(3) | N(6)-C(21)-C(40)     | 117.1(3) |
| N(11)-C(18)-C(19)    | 125.7(3) | C(40)-C(21)-C(22)    | 119.9(3) |
| N(11)-C(18)-C(17)    | 109.2(3) | C(56)-C(55)-C(14)    | 119.3(3) |
| C(19)-C(18)-C(17)    | 125.2(3) | C(60)-C(55)-C(56)    | 119.8(3) |
| C(58)-C(57)-C(56)    | 118.1(3) | C(60)-C(55)-C(14)    | 120.8(3) |
| C(11)-C(12)-C(13)    | 107.5(3) | C(90)-C(91)-C(92)    | 117.5(3) |
| C(17)-C(16)-C(15)    | 106.7(3) | C(116)-C(117)-C(118) | 120.6(4) |
| N(2)-C(22)-C(21)     | 136.6(3) | C(121)-C(120)-C(119) | 117.6(4) |
| C(23)-C(22)-N(2)     | 108.0(3) | C(71)-C(72)-C(73)    | 122.4(3) |
| C(23)-C(22)-C(21)    | 114.8(3) | C(16)-C(17)-C(18)    | 107.7(3) |
| N(4)-C(32)-C(33)     | 109.1(3) | N(1)-C(37)-C(38)     | 108.9(3) |
| N(4)-C(32)-C(31)     | 126.2(3) | C(36)-C(37)-N(1)     | 124.8(3) |
| C(31)-C(32)-C(33)    | 124.7(3) | C(36)-C(37)-C(38)    | 126.2(3) |
| C(70)-C(69)-C(9)     | 120.1(3) | C(39)-C(38)-C(37)    | 107.8(3) |
| C(74)-C(69)-C(9)     | 119.5(3) | C(55)-C(60)-C(59)    | 121.3(3) |
| C(74)-C(69)-C(70)    | 120.4(3) | C(22)-C(23)-C(24)    | 114.2(3) |
| C(18)-C(19)-C(42)    | 119.4(3) | C(2)-C(23)-C(22)     | 121.9(4) |
| C(20)-C(19)-C(18)    | 124.4(3) | C(2)-C(23)-C(24)     | 122.4(4) |
| C(20)-C(19)-C(42)    | 115.7(3) | N(2)-C(25)-C(24)     | 108.1(3) |
| N(11)-C(15)-C(16)    | 109.0(3) | C(26)-C(25)-N(2)     | 123.8(3) |
| N(11)-C(15)-C(14)    | 125.3(3) | C(26)-C(25)-C(24)    | 128.1(3) |
| C(14)-C(15)-C(16)    | 125.5(3) | C(29)-C(28)-C(27)    | 107.4(3) |
| C(90)-C(89)-C(88)    | 119.7(3) | N(3)-C(30)-C(31)     | 125.6(3) |
| C(90)-C(89)-C(36)    | 121.8(3) | N(3)-C(30)-C(29)     | 109.1(3) |
| C(88)-C(89)-C(36)    | 118.4(3) | C(31)-C(30)-C(29)    | 125.2(3) |
| C(43)-C(42)-C(19)    | 117.3(3) | C(103)-C(104)-C(105) | 117.6(3) |
| C(41)-C(42)-C(19)    | 122.8(4) | C(25)-C(26)-C(27)    | 123.7(3) |

|                      |          |                      |          |
|----------------------|----------|----------------------|----------|
| C(25)-C(26)-C(116)   | 119.2(3) | N(4)-C(35)-C(34)     | 109.2(3) |
| C(27)-C(26)-C(116)   | 116.8(3) | C(36)-C(35)-C(34)    | 125.0(3) |
| N(6)-C(1)-C(20)      | 139.5(3) | C(74)-C(73)-C(72)    | 117.8(4) |
| N(6)-C(1)-C(2)       | 119.8(3) | N(9)-C(5)-C(4)       | 121.2(3) |
| C(2)-C(1)-C(20)      | 100.1(3) | N(9)-C(5)-C(6)       | 111.2(3) |
| C(93)-C(92)-C(91)    | 122.6(3) | C(4)-C(5)-C(6)       | 127.6(3) |
| C(89)-C(88)-C(93)    | 121.0(3) | C(38)-C(39)-C(40)    | 106.2(3) |
| N(3)-C(27)-C(28)     | 109.6(3) | C(3)-C(2)-C(1)       | 114.1(3) |
| N(3)-C(27)-C(26)     | 125.4(3) | C(23)-C(2)-C(3)      | 122.1(4) |
| C(28)-C(27)-C(26)    | 124.9(3) | C(23)-C(2)-C(1)      | 122.3(3) |
| N(9)-C(8)-C(9)       | 125.2(3) | N(7)-C(4)-C(3)       | 122.6(3) |
| N(9)-C(8)-C(7)       | 109.1(3) | N(7)-C(4)-C(5)       | 117.1(3) |
| C(9)-C(8)-C(7)       | 125.6(3) | C(5)-C(4)-C(3)       | 120.3(3) |
| N(8)-C(20)-C(1)      | 109.1(3) | C(7)-C(6)-C(5)       | 106.1(3) |
| C(19)-C(20)-N(8)     | 123.9(3) | C(88)-C(93)-C(92)    | 117.9(3) |
| C(19)-C(20)-C(1)     | 127.0(3) | C(102)-C(103)-C(104) | 122.4(3) |
| C(120)-C(121)-C(116) | 120.9(4) | C(119)-C(118)-C(117) | 117.9(3) |
| N(1)-C(40)-C(21)     | 122.1(3) | C(118)-C(119)-C(120) | 123.1(3) |
| N(1)-C(40)-C(39)     | 111.2(3) | C(42)-C(43)-C(44)    | 121.5(4) |
| C(21)-C(40)-C(39)    | 126.7(3) | C(32)-C(31)-C(102)   | 116.9(3) |
| C(107)-C(102)-C(31)  | 119.7(3) | C(30)-C(31)-C(32)    | 125.8(3) |
| C(103)-C(102)-C(107) | 118.4(3) | C(30)-C(31)-C(102)   | 117.3(3) |
| C(103)-C(102)-C(31)  | 121.9(3) | C(28)-C(29)-C(30)    | 107.0(3) |
| C(117)-C(116)-C(26)  | 119.2(3) | C(69)-C(74)-C(73)    | 121.0(3) |
| C(117)-C(116)-C(121) | 120.0(3) | N(7)-C(24)-C(23)     | 119.1(3) |
| C(121)-C(116)-C(26)  | 120.7(3) | N(7)-C(24)-C(25)     | 139.0(3) |
| C(34)-C(33)-C(32)    | 107.4(3) | C(23)-C(24)-C(25)    | 101.3(3) |
| C(69)-C(70)-C(71)    | 120.0(4) | C(33)-C(34)-C(35)    | 107.6(3) |
| C(13)-C(14)-C(55)    | 116.0(3) | C(6)-C(7)-C(8)       | 107.8(3) |
| C(15)-C(14)-C(13)    | 126.2(3) | C(42)-C(41)-C(46)    | 119.7(4) |
| C(15)-C(14)-C(55)    | 117.8(3) | C(45)-C(44)-C(43)    | 117.4(4) |
| C(37)-C(36)-C(89)    | 117.7(3) | C(45)-C(46)-C(41)    | 118.0(4) |
| C(37)-C(36)-C(35)    | 127.0(3) | C(44)-C(45)-C(46)    | 123.7(4) |
| C(35)-C(36)-C(89)    | 115.3(3) | C(85)-C(86)-C(87)    | 119.0(5) |
| N(4)-C(35)-C(36)     | 125.7(3) |                      |          |

## 9. References

[S1] (a) K. Fujimoto, D. Shimizu and A. Osuka, Porphyrin-stabilized nitrenium dication, *Chem.-Eur. J.*, 2019, **25**, 521-525; (b) K. Fujimoto, D. Shimizu, T. Mori, Y. Li, M. Zhou, J. Song and A. Osuka, Selective formation of helical tetrapyrin-fused porphyrins by oxidation of  $\beta$ -to- $\beta$  linked meso-aminoporphyrin dimers, *Chem.-Eur. J.*, 2019, **25**, 1711-715.

[S2] (a) W. J. Hehre, R. Ditchfield and J. A. Pople, Self-Consistent Molecular Orbital Methods. XII. Further Extensions of Gaussian-Type Basis Sets for Use in Molecular Orbital Studies of Organic Molecules, *J. Chem. Phys.*, 1972, **56**, 2257-2261; (b) T. Yanai, D. P. Tew and N. C. Handy, A new hybrid exchange-correlation functional using the coulomb-attenuating method (CAM-B3LYP), *Chem. Phys. Lett.*, 2004, **393**, 51-57; (c) M. J. Frisch, G. W. Trucks, H.B. Schlegel, G. E. Scuseria, M. A. Robb, J. R. Cheeseman, *et al.* J gaussian 09 revision D 01. Wallingford CT: Gaussian Inc; 2009.
